# Supplementary material for: Early evolution of the land plant circadian clock
Source: PubMed Central journal article supplement (PMC5638080; doi:10.1111/nph.14487), 2017-02-28
Supplement: NPH-216-576-s001.pdf [file NPH-216-576-s001.pdf]

## **New Phytologist Supporting Information**

Article title: **Early evolution of the land plant circadian clock**

Authors: Anna-Malin Linde, D. Magnus Eklund, Akane Kubota, Eric R. A. Pederson, Karl Holm, Niclas Gyllenstrand, Ryuichi Nishihama, Nils Cronberg, Tomoaki Muranaka, Tokitaka Oyama, Takayuki Kohchi and Ulf Lagercrantz

Article acceptance date: 18 January 2017

The following Supporting Information is available for this article:

**Fig. S1** Alignments used for phylogenetic construction

**Fig. S2** Inferred phylogeny of homologs to the ELF3 family

**Fig. S3** Inferred phylogeny of homologs to the ELF4 family

**Fig. S4** Inferred phylogeny of homologs to the LUX family

**Fig. S5** Inferred phylogeny of homologs to the GI gene family

**Fig. S6** Inferred phylogeny of homologs to the ZTL gene family

**Fig. S7** Temporal expression patterns of putative circadian clock genes in *M. polymorpha* (Mp) under ND, LL and DD conditions

**Fig. S8** Generation of MpRVE knockout mutant

**Fig. S9** Generation of MpPRR knockout mutant

**Fig. S10** Generation of MpTOC1 knockout mutants

**Fig. S11** Temporal expression pattern of MpPRR and 35S<sub>pro</sub>:LUC under ND and LL conditions

**Fig. S12** Temporal expression pattern of MpPRR in WT, Mprve<sup>ko</sup>, Mptoc1<sup>ko</sup> and restored lines of Mprve<sup>ko</sup>

**Fig. S13** pro:LUC bioluminescence for Mp*ELF3*, Mp*GI*, Mp*LUX* and Mp*RVE*

**Fig. S14** Luciferase imaging in transgenic *M. polymorpha* plants expressing luciferase under the control of *M. polymorpha* promoters

**Fig. S15** Mp*PRR<sub>pro</sub>*:*GUS* expression in mature thallus

**Fig. S16** Temporal expression patterns of putative circadian clock genes in *A. agrestis* (Aa) under ND, LL and DD conditions

**Table S1** Gene names, family/sub-clade, gene ID or accession number

**Table S2** Oligonucleotides used in this study

**Methods S1** Supplemental materials and methods describing sequence retrieval, sequence analysis and phylogenetic reconstruction

**Fig. S1** Alignments used for phylogenetic construction. Amino acid sequences were aligned using the M-Coffee algorithm in T-Coffee (Notredame *et al.*, 2000; Wallace *et al.*, 2006). Alignments were filtered using Transitive Consistency Score (TCS) in the T-Coffee distribution (Chang *et al.*, 2014). (a) CCA1/LHY/RVE, (b) PRR/TOC1, (c) ELF3, (d) ELF4, (e) LUX, (f) GI, (g) ZTL.

**(a)**

```
#NEXUS
BEGIN DATA;
dimensions ntax=31 nchar=215;
format missing=?
symbols="ABCDEFGHIJKLMNOPQRSTUVWXYZ"
interleave datatype=PROTEIN gap=- match=.;

matrix
OsRVE6      MDRSSSEMPGKKARKPYTITKPRERWSEEEHERFLDALIMYGRDWKKIEE
PaCCA1-3    MLPFSIDEPFSKVRKPYTITKQRRERWTEDEHKKFLDALKLYGRSWRHIEE
PaCCA1      MMSSSGDELAALKVRKPYTITKQRRERWSEEEHLKFLEALKMYGAWRRIEE
KfRVE      MLGGKGDDMHGKVRKPYTITKQRENWTEQEHNKFLKALELFD RDWRKIEE
MpRVE      MA-QGSEEGSKKVRKPYTITKSRESWTEQEHDKFLEALQLFDRDWKKIEA
AtRVE5      MVSSFSIEDPTTKIRKPYTIKKSRENWTDQEHDKFLEALHLFDRDWKKIEA
AtRVE3      MVTSFFEDPTTKVRKPYTITKSRENWTEQEHDKFLEALHLFDRDWKKIKA
AtRVE4      MTSEAGEAPEKKVRKAYTITKSRESWTEGEHDKFLEALQLFDRDWKKIED
AtRVE8      MSSAVAEGSSKKVRKPYTITKSRESWTEEEHDKFLEALQLFDRDWKKIED
OsRVE5      MSSEVEDDGGRRVRKPYTITKSRESWTDPEHDKFLEALQLFDRDWKKIEA
AaRVE      MF-GVTEEGSKKIRKPYTITKSRESWTEQEHDKFLEALQLFDRDWKKIEA
SmRVE      ---PSDDAVSKKIRKPYTITKSRESWTEQEHDKFLEALQLFDRDWKKIEA
OsRVE4      MVSSAGEDASKKVRKPYTITKSRESWTEQEHDKFLEALQLFDRDWKKIEA
AtRVE6      MVSSSEEDLSKKIRKPYTITKSRESWTEPEHDKFLEALQLFDRDWKKIEA
PpRVE1      MNASVSEEGSKKIRKPYTITKSRESWTEQEHDKFLDALQLFDRDWKKIEA
PpRVE2      MNAPVSEEGSKKIRKPYTITKSRESWTEQEHDKFLEALQLFDRDWKKIEA
PpRVE3      MNASVSEEGSKKIRKPYTITKSRESWTEQEHDKFLEALQLFDRDWKKIEA
KfCCA1      MDMSTSESLSTKVRKPYTITKQRRERWTEAEHDFLEALKLHGAWRRKIEE
PaCCA1-2    MASSSGDEFTTKVRKPYTITKQRRERWTEEEHHKFLEALKMHGAWRRIEE
OsCCA1      ---SSGEEAVVKVRKPYTITKQRRERWTEAEHNRFLKLYGAWQRIEE
AtLHY      ---TSGEELLAKARKPYTITKQRRERWTEDEHERFLKLYGAWQRIEE
AaCCA1      MNSSSGDELAMKVRKPYTITKQRRERWTEEEHTKFLEALKLYGAWRRIEE
AtCCA1      ---SSGEDLVIKTRKPYTITKQRRERWTEEEHNRFLKLYGAWQKIEE
OsRVE2      MARMMDEARIPKARKPYTITKQREKWTEDEHKLFLKLYGAWRRIQE
OsRVE1      MACLSGEEHVPKARKPYTITKQREKWTEDEHRLFLKLYGAWRRIQE
AtRVE7      MLCSHWIENVVKVRKPYTVTKQREKWSEEEHDFLEAIKLYGRGWRQIQE
AtRVE7Like  MVMSHWIENVVKVRKPYTVTKQREKWSEEEHDFLEAIKLYGRGWRQIQE
PpCCA1a     -----VRKPYTITKQRRERWTEEEHQRFLEALKLYGAWRRIEE
PpCCA1b     ---SGDEGASTKVRKPYTITKQRRERWTEEEHQRFLEALKLYGAWRRIEE
OsRVE3      MASEGMEEFPVKVRKPYTITKQREKWTEEEHDKFLEALKLYGRSWRQIQE
```

|            |                                                      |
|------------|------------------------------------------------------|
| AtRVE2     | M--SSSDAFYLKTRKPYTITKQREKWTEAEHEKFVEALKLYGRAWRRIEE   |
| AtRVE1     | MASFGGNDYAPKVRKPYTITKERERWTDEEHKKFVEALKLYGRAWRRIEE   |
| OsRVE6     | HVGTKTTIQIRSHAQKYFLKVQKMGLAA--GLPPQYPRRRLVMQQQQQOS   |
| OsCCA1-3   | HIGTKSAVQIRSHAQKFFTKLEKGASTGYLEIPPPRPKRKPGHPYPKKTG   |
| PaCCA1     | HIGTKTAVQIRSHAQKFFSKLVRGSSSKDIDI PPPRPKRKPRHPYPRKAV  |
| KfRVE      | YVGTKTVIQIRSHAQKYFLKVQKLGQDA--HVPPRPKRKSSQYPYPQKAS   |
| MpRVE      | FVGSKSVIQIRSHAQKYFLKVQKNGTGE--HVPPRPKRKSAQYPYPQKAP   |
| AtRVE5     | FVGSKTVVQIRSHAQKYFLKVQKSGANE--HLPPRPKRKASHPYPIKAP    |
| AtRVE3     | FVGSKTVIQIRSHAQKYFLKVQKNGTKE--HLPPRPKRKANHPYPQKAP    |
| AtRVE4     | FVGSKTVIQIRSHAQKYFLKVQKNGTLA--HVPPRPKRKAAHPYPQKAS    |
| AtRVE8     | FVGSKTVIQIRSHAQKYFLKVQKNGTLA--HVPPRPKRKAAHPYPQKAS    |
| OsRVE5     | YVGSKTVIQIRSHAQKYFLKVQKNGTGE--HLPPRPKRKAAHPYPHKAS    |
| AaRVE      | FVGSKTVIQIRSHAQKYFLKVQKNGTGE--HVPPRPKRKSAQYPYPQKAP   |
| SmRVE      | FVGSKTVIQIRSHAQKYFLKVQKNGTGE--HVPPRPKRKSAQYPYPQKAA   |
| OsRVE4     | FVGSKTVIQIRSHAQKYFLKVQKNGTSE--HVPPRPKRKAAHPYPQKAS    |
| AtRVE6     | FIGSKTVIQIRSHAQKYFLKVQKSGTGE--HLPPRPKRKAAHPYPQKAH    |
| PpRVE1     | FVGSKTVIQIRSHAQKYFLKVQKNRTGE--HVPPRPKRKSAQYPYPQKAS   |
| PpRVE2     | FVGSKTVIQIRSHAQKYFLKVQKNGTGE--HVPPRPKRKSVQYPYPQKAP   |
| PpRVE3     | FVGSKTVIQIRSHAQKYFLKVQKNGTGE--HVPPRPKRKSAQYPYPQKAP   |
| KfCCA1     | HIGSKTAVQIRSHAQKFFSKLEREGSTAEIDI PPPRPKRKPSHPYPRKAG  |
| OsCCA1-2   | HIGTKTAVQIRSHAQKFFSKLEREASAGDISI PPPRPKRKPSHPYPRKAG  |
| OsCCA1     | HVGTKTAVQIRSHAQKFFTKLEKEAINNDIDI PPPRPKRKPNSPYPRKSC  |
| AtLHY      | HIGTKTAVQIRSHAQKFFTKLEKEAEVKDIEI PPPRPKRKPNTPYPRKPG  |
| AaCCA1     | HIGTKTAVQIRSHAQKFFSKLEREATAADIDI PPPRPKRKPSHPYPRKAG  |
| AtCCA1     | HVATKTAVQIRSHAQKFFSKVEKEAEAKDIAI PPPRPKRKPNNPYPRKTG  |
| OsRVE2     | HIGTKTAVQIRSHAQKFFSKVIKESSGDSIQI PPPRPKRKPVHPYPRNLG  |
| OsRVE1     | HIGTKTAVQIRSHAQKFFSKVRESSGSAIQI PPPRPKRKPAHPYPRKVD   |
| AtRVE7     | HIGTKTAVQIRSHAQKFFSKMAQEADSRAIVI PPPRPKRKPAHPYPRKSP  |
| AtRVE7Like | HIGTKTAVQIRSHAQKFFSKMAQEADSRAIVI PPPRPKRKPAHPYPRKSP  |
| PpCCA1a    | HIGTKTAVQIRSHAQKFFSKIERDVSAGVIDI PPPRPKRKPSHPYPRKAG  |
| PpCCA1b    | HIGTKTAVQIRSHAQKFFSKIERDVTAGVIDI PPPRPKRKPTHYPYPRKAG |
| OsRVE3     | HIGTKTAVQIRSHAQKFFSKVREPGS-AIEI PPPRPKRKPLHPYPRKCA   |
| AtRVE2     | HVGTKTAVQIRSHAQKFFTKVARDFGV-SIEI PPPRPKRKPMHPYPRKLV  |
| AtRVE1     | HVGSKTAVQIRSHAQKFFSKVAREATGGPIVI PPPRPKRKPAHPYPRKFG  |
| OsRVE6     | SPA-----MQNLEWASTSGTAAWGNHHGLPFVSFE-----TT-----      |
| OsCCA1-3   | VID-----KSTIHKSSVFSNTNWSA--LSYTHQ-QQEDEKQRNK----L    |
| PaCCA1     | GTA-----AEAVAVATVAAASAWWSLYGASLHPR-AENISSV-KAREGIQ   |
| KfRVE      | KVV-----TPSKANPDFAK--V-YRFLGDVFEIGVAGNLQKCLKMPPIDR   |
| MpRVE      | KAV-----TDLRATPDFAE--V-YKFIGNVFDPGSNHNLLKCLKEMAPIDR  |
| AtRVE5     | KNV-----KPHRVMPNFAE--V-YSFIGSVFDPNTSGHLQRLKQMDPINM   |
| AtRVE3     | KFT-----KPHRVAPNFAE--V-YNFIGSVFDPKTTGHVKRLKEMDPINL   |
| AtRVE4     | KNA-----PSMHGLPDFAE--V-YNFIGSVFDPDSKGRMCKLKEMDPINF   |
| AtRVE8     | KNA-----PVLHGVPDFAE--V-YNFIGSVFDPETRGHVEKCLKEMDPINF  |
| OsRVE5     | KRA-----PTLRAMPDFAQ--V-YNFLGSI FDPETSGHLQRLREMDPIDV  |
| AaRVE      | KSV-----ASLRATPDFAQ--V-YKFIGSVFDPGTAGHLKCLKEMAPIDR   |

|            |                                                      |
|------------|------------------------------------------------------|
| SmRVE      | KPG-----VTLSAAPAFSE--V-YKFIGSIFDPGTAGHLKKLREMAPIDR   |
| OsRVE4     | KNE-----PSLRLMPDFAQ--V-YSFLGSVFDPSTSGHLQKLKEMNPIDV   |
| AtRVE6     | KNV-----HSLRVLPDFAQ--V-YGFIGSVFDPYASNHLQKLKMDPIDV    |
| PpRVE1     | KCV-----SCIRAAPDFAE--V-YKFIGSVFDPIVSGHLRTLKEMAAIDR   |
| PpRVE2     | KTA-----SCIRAAPDFAE--V-YKFIGSVFDPGVSGHLRKLKEMSAIDR   |
| PpRVE3     | KCG-----SCIRAAPDFTE--V-YKFIGSVFDPGVSGHLRKLKEMSPIDR   |
| KfCCA1     | GNM-----AAAVAAATMAAASAWWTLQNNAQFP-QAKESEEQK-G--SMG   |
| OsCCA1-2   | TAI-----IMAAVTAATVAAASAWWTLHGAPLHPG-SGNSSPL-KTEDGNE  |
| OsCCA1     | LSSGIH--MASIVTATVAAASAWWATQGLL-PPP--ADVQRAQEKQDNDE   |
| AtLHY      | NNG-----ITAIAAATVAAATAWWASHGLV-API--VAVPTPAMTQDQDS   |
| AaCCA1     | GSF---Y-AAAVAAATIAAASAWWALQGSVPHP-APTRTQKQE--DEGVP   |
| AtCCA1     | SGT-----LAAMAAATVAAASAWWAANGLL-APL--HPSTFGPSCQEHS    |
| OsRVE2     | STA-----PNGQVHSALPCFTYHNEF-NPQ-----                  |
| OsRVE1     | GAA-----GFAAQPVMPWLSYNGSCF-----AAA                   |
| AtRVE7     | VPY-----                                             |
| AtRVE7Like | VPY-----                                             |
| PpCCA1a    | KI-----AVSAMAATIAAASAWWAMHGGPMHPAV-----QCGENIP       |
| PpCCA1b    | RSF-----AVSAMAATIAAASAWWAMQGGPMHPAA-----QCGQEVN      |
| OsRVE3     | NSG-----GESAADARIPPLHVWWPYYGFI-HPR-----SDESS         |
| AtRVE2     | IP-----                                              |
| AtRVE1     | NE-----LS--SSKTL-----PI-RNSQEELLCW---PL              |
| OsRVE6     | -----LP--LSP-----                                    |
| OsCCA1-3   | EAIVL-----QS-----                                    |
| PaCCA1     | ESNDARC---HAEKQ-----GKERSQCASNTPRRGAF-               |
| KfRVE      | ETIILLMRNLAINLASPVFAEQQHILALAD--QPRM-IEPESQ----EQ-   |
| MpRVE      | ETVLLLMRNLSINLSSPEFEERKLFMPAFE--QHLLA-MLSAQ--PHRTH-  |
| AtRVE5     | ETVLLLMQNLSVNLTSPFEAEQRRLISSYS-----                  |
| AtRVE3     | ETVLLLMKNLSVNLTSPFEDEQRKLISSYN-----                  |
| AtRVE4     | ETVLLLMRNLTVNLSNPDFEPTSEYVDAAE-----                  |
| AtRVE8     | ETVLLLMRNLTVNLSNPDLSTRKVLSSYD-----                   |
| OsRVE5     | ETVLLLMKNLSINLTNPNFEAHRKVLASHG-----HE---             |
| AaRVE      | ETVLLLMRNLSINLSSPDFEEHKLFLSVYD--QING-PSTAPAPSKHRY-   |
| SmRVE      | ETVLLLMRNLAIDLSSPDFDQRVKVFADK-----CF-                |
| OsRVE4     | ETALLLMRNLSINLTSPDFEDQKLLSSYS-----EL-                |
| AtRVE6     | ETVLLLMRNLSINLSSPDFEDHRLLSSYD-----TDH-               |
| PpRVE1     | ETVLLLMRNLSINLSSPDFDEHKLFPVID--DSTS-IPGAPQPTPRSY-    |
| PpRVE2     | ETVLLLMHNLAINLASPDFEEH-----TARSH-                    |
| PpRVE3     | ETVLLLMRNLSINLASPDFEEHKLKLYLSVYV--DLTS-APSAAQ-TPRSY- |
| KfCCA1     | APGGVPR--EAAIRRAERANKLREL-----KGLRTQSASGSNEPRGAEG-   |
| OsCCA1-2   | ESCDVEM---QIENQ-----IKERSSSGSNTPWEGAF-               |
| OsCCA1     | S--EVSL---HTEL-----KQDRSSCGSNTPWEGAF-                |
| AtLHY      | D--VTKL---NADS-----LVDRSSCGSNTPWEGAF-                |
| AaCCA1     | DEAPSRK--CSAAKRAERASRMKEQ-----ARVRSVSGSNTPRGGDG-     |
| AtCCA1     | E-----V---ENKS-----QVDRSSCGSNTPWEGAF-                |
| OsRVE2     | -----QREGSWTESNTSY-----                              |
| OsRVE1     | -----AANQQCHR-----QREGSLTGSNTA-----                  |

```

AtRVE7          -----ETFCTGSNAFW-----
AtRVE7Like     -----FCTGS---S-----
PpCCA1a       INGN-SR--SSAMRRAERAQLVKEL-----SSNSSACGSSDGRRGAFL
PpCCA1b       SNNNHSR--SSAMRRAERAQRVKEL-----SSNSSACGSSDGRRGAFL
OsRVE3        S-----S--L-
AtRVE2        -----SETQSQCSSSTS-----
AtRVE1        KQEDVEN-----QNEGSSTGSNTG-----

```

```

OsRVE6        -----FEPIRRLLS
OsCCA1-3      --SGAGFVVPYKGCQK
PaCCA1       -KSGVGFVPYERCS-
KfRVE        -----P-----
MpRVE        -GFGMPLPTLT----
AtRVE5       -----
AtRVE3       -----
AtRVE4       -----S---
AtRVE8       -----A---
OsRVE5       -----K---
AaRVE        -VYGLGMPPLA----
SmRVE        -----KVRK
OsRVE4       -----P-----
AtRVE6       -----
PpRVE1       -VYSLPLPSLP----
PpRVE2       -VYS--LPSLP----
PpRVE3       -VYSAPLPSLP----
KfCCA1       HGGSSGFVVPYKGYQG
OsCCA1-2     -NFFQGSVTWETLCF
OsCCA1       -SRRTGFKPYKRCSV
AtLHY        -TRQTGFKPYKRCSM
AaCCA1       -FSGVGFVPYQRNST
AtCCA1       -RGRTGFKPYKRCSM
OsRVE2       -NCRRGFVPYKRCVA
OsRVE1       -LLQRGFMPYKRCAA
AtRVE7       -VNASGFRPYKRCLS
AtRVE7Like   -VNASGFRPYKRCLS
PpCCA1a     -YSGVGFVPYQRVSI
PpCCA1b     -YSGVGFVPYQRAST
OsRVE3       -EVIRGFVPYKRCKF
AtRVE2       -NNMRGFMPYKKRVK
AtRVE1       -SNSRGFGPYKKRKM

```

```

;
end;

```

**(b)**

```

#NEXUS
BEGIN DATA;
dimensions ntax=25 nchar=361;
format missing=?
symbols="ABCDEFGHIJKLMNOPQRSTUVWXYZ"
interleave datatype=PROTEIN gap=- match=.;

matrix
KfTOC1      M-----HDVTTFHRSSVHILLADRDLQTRKEVFELLRRC SYKVT
PaPRR1      M-----AGSSVLD RSCVRILLCDKDP TNSQQLELLRKC MYQVT
MpTOC1      M-----GRRVVFDRSRLRILLCDPNTSP--EVVDLLQRCSYQVV
SmTOC1      M-----EGKIGFDRSRVRILLCDKDSATAQEVKELLCRCSYQVS
AtTOC1      M-----DGFIDRSRVRILLCDNDSTSLGEVFTLLSECSYQVT
OsPRR1      MV-----EGQQFVDRSKVRILLCDSDPSSSREVLRLLCNCSYQVT
OsPRR59     -----
OsPRR95     MG-----RETRMLPRMPVRVLLAEGDDSTRHIIICALLRKC GYRVA
AtPRR7      MN-----CWERFLHVRTIRVLLVENDDC TRYIVTALLRNC SYEYV
OsPRR37     MM-----CWERFIQKKTIKVLLVDSDDSTRQVVSALLRHCMY EVI
OsPRR73     -----RWERFLPVKTLRVLLVENDDSTRQVVSALLRKC CYEVI
PaPRR3      MQ-----VKDQHQPQRCLKVLLVEDDDSTRKVVRALLCHCR YEVT
AtPRR5      MW-----KWERFLPKIALRVLLVEADDSTRQIIAALLRKC SYRVA
KfPRR       MT-----SWQATLPSKHLRVLLVEDDDCTRHVVAALLRNC GYEVT
AtPRR9      MG-----QWEKYLPKTVLRVLLVESDYSTRQIITALLRKC CYKVV
SmPRR7b     M-----QAENAFQHHLKVLLVEDDDSTRHVVAALLRNC GYEVT
AtPRR3      MC-----KWEYLPVRS LKVLLVENDDSTRHIVTALLKNC SYEVT
SmPRR7a     MT-----GWENLPPYRQLKVLLVEDDDSTRHVVAALLRNC GYQVV
PaPRR7      MW-----RWSLLVHLQPLVD-----VV-----SVV
AaPRR       MT-----GWESFLPQRHLRVLLVEDDDSTRHVVGALLRNC SYEVT
MpPRR       MS-----AEEQGWESFLPRKHIRVLLAEDDDSTRHVVGALLRNC GYEVT
PpPRR4      MDVARAGE---GWESFLLKRNLKVLLVEDDDATRHVVGALLRNC NYEVT
PpPRR3      -----MLSLLL-N-----VE
PpPRR1      -----GWESFLLKRSLRILLVEYDDATRHVVGALLRNC DYEVT
PpPRR2      -----SWESFLLKRKL RVLLVEDDDATRHVVGALLRNC NYEVT

KfTOC1      AVESAKHVLEVL RAGGPAVDVILSEVEFPHGKGLKLLKHIM REEKLKQIP
PaPRR1      AVSTARGVVSILNAEGQEIDLILADVDLPKSKGFKMLKYITRSTCLQRIP
MpTOC1      AVQNDARQVMEVLRNGMSDVDLILAEVELPKKKGFKMLKHITKEERLKQIP
SmTOC1      VVKTARQVVEVLNITDSKVDLVLSEVELPNGRGFKMLKHIVKSENFKHIP
AtTOC1      AVKSARQVIDALNAEGPDIDII LAEIDLPMAGMKMLRYITRDKDLRRIP
OsPRR1      CAKSPRQVINVLNCEAGEIDII LAEVDLPVSKCFKMLKYIARNKELRHIP
OsPRR59     -----MKAWGVMRERAYAFDLVLTEVTMPTLSGIELLSRIVASDECKNIP
OsPRR95     AASDGVKAWDILKEKSFNIDLVLTEVELPLMSGFLLLSTIMEHDACKNIP
AtPRR7      EASNGIQAWKVLEDLNNHIDIVL TEVIMPYLSGIGLLCKIILNHKSRRNIP
OsPRR37     PAENGQQAWTYLEDM QNSIDLVLTEVVM PGVSGISLLSRIMNHNICKNIP
OsPRR73     PAENGLHAWQCLEDLQNHIDLVL TEVVM PRLSGIGLLSKITSHKICKDIP
PaPRR3      AVANGLQAWDLLEDTRNQFDLVLTEAMGPCLSGIDLLSKIMSHRITYKHIP

```

|         |                                                      |
|---------|------------------------------------------------------|
| AtPRR5  | AVPDGLKAWEMLKGPESVDLILTEVDLPSISGYALLTLIMEHDICKNIP    |
| KfPRR   | PAADGFQALKLLSDKMKQFDLVLTEVVMPLSGIQLLSRIQQRDQHKRMP    |
| AtPRR9  | AVSDGLAAWEVLKEKSHNIDLILTELDLPSISGFALLALVMEHEACKNIP   |
| SmPRR7b | PAASGLQAWIELETRSSVLDLVLTDLMPRLSGIELLGKIMSRDSPKRIP    |
| AtPRR3  | AVPDVLEAWRILEDEKSCIDLVLTEVDMPVHSGTGLLSKIMSHKTLKNIP   |
| SmPRR7a | PAANGLQAWSLLDDRREIDLVLTDVVMPLSGLGLLSSKIMHHKHNHQKVP   |
| PaPRR7  | AVANGQQAWKLEDPNHFIDLVLTEVVMPLSGIGLLCKIMGRSTCKNIP     |
| AaPRR   | SAGNGLQAWELLETPSNHFIDLVLTDVVMPLSGVGLLSRIMSLDPGKRVP   |
| MpPRR   | SAANGMQAWEMLEDPNFFDLVLTDVVMPLSGVGLLTKIMSREAGKRIP     |
| PpPRR4  | PVANGSLAWGLLEEANSNFDLVLTDVVMPLYLSGVGLLSSKMMKREACKRVP |
| PpPRR3  | PR-----PELEDANSNFDLVLTDVVMPLSGVGLLSSKMMKREACKRVP     |
| PpPRR1  | AVANGSIAWGLLEDANSNFDLVLTDVVMPLSGVGLLSSKMMKREACRRVP   |
| PpPRR2  | SVANGSLAWGLLEEANSNFDLVLTDVVMPLSGVGILSKMLKREACKRVP    |
|         |                                                      |
| KfTOC1  | VMMSSQRDEMALVVKSLRLGAADYLVKPLRTNELLNWTHMWRRRRMLGM    |
| PaPRR1  | IVMMSARDEVTVVMKCLKLGADYLVKPLRINELLNWTHMWRRRRMLGL     |
| MpTOC1  | IVMSSSRDEMAVVVKCLRLGAADYLVKPLRTNELLNWTHMWRRRRMLGM    |
| SmTOC1  | IVMMSARDEMVAVVVKCLKLGADYLVKPLRINELLNWTHMWRRRRMLGL    |
| AtTOC1  | VIMMSRQDEVVVVKCLKLGADYLVKPLRTNELLNWTHMWRRRRMLGL      |
| OsPRR1  | IIMMSNRDEVSVVVKCLRLGAAEYLVKPLRMNELLNWTHVWRRRRMLGL    |
| OsPRR59 | VIMSSSQDSIGTVLRCMQKGAVDFLVKPVKRNELRNWQHVVRRHAMNSQ    |
| OsPRR95 | VIMSSSNDSVSMVFKCMLKGAADFLVKPIRKNELRNWQHVVWRKQLSSGV   |
| AtPRR7  | VIMSSSHDSMGLVFKCLSKGAVDFLVKPIRKNELKILWQHVVRRRCQSSSG  |
| OsPRR37 | VIMSSNDAMGTVFKCLSKGAVDFLVKPIRKNELKNLWQHVVRRCHSSSG    |
| OsPRR73 | VIMSSSNDSMGTVFKCLSKGAVDFLVKPIRKNELKNLWQHVVRRCHSSSG   |
| PaPRR3  | VIMSSSHDSMILIFKCLTMGAVDFLIKPLRKNELKNIWKHIWKRHQNSSA   |
| AtPRR5  | VIMMSTQDSVNTVYKCMKLGADYLVKPLRRNELRNWQHVVRRRQTS LAP   |
| KfPRR   | VIMSSSKDATDVVFKCFQGAADFLVKPVKRNELKNLWQHVVRRCKSSSG    |
| AtPRR9  | VIMSSSQDSIKMVLKCMKLGADYLIKPMRNELKNLWQHVVRRRLTLRDD    |
| SmPRR7b | VMMSSCLDSMDVVLKCLSKGAVDFLVKPVKRNELKNLWQHVFWRMCLSSSG  |
| AtPRR3  | VIMSSSHDSMVLVFKCLSNGAVDFLVKPIRKNELKNLWQHVVRRCHSVSG   |
| SmPRR7a | VMMSSSHDSTNVVFKCLTKGAADFLVKPVKRNELKNLWQHAWRKARSSSG   |
| PaPRR7  | VIMSSSHDSMGTVFKCLSKGAVDFLVKPVKRNELKNLWQHVVRRRCQSNVD  |
| AaPRR   | VMMSSSHDSMDFVFRCLSKGAADYLVKPVKRNELKNLWQHVVWRKCHSSSG  |
| MpPRR   | VIMSSSHDSL DIVYRCLFKGAADFLVKPVKRNELKNLWQHVVWR-CQSSSG |
| PpPRR4  | IVIMSSYDSLGI VFRCLSKGACDYLVKPVKRNELKNLWQHVVWRKCHSSSG |
| PpPRR3  | IVVMSSYDSL DIVFRCLSKGACDYLVKPVKRNELRNWQHVVWRKCRSSSG  |
| PpPRR1  | IVIMSSYDSL DIVFRCLSKGACDYLVKPVKRNELRNWQHVVWRKCHSL--  |
| PpPRR2  | IVIMSSYDSLNI VFRCLSKGACDYLVKPVKRNELKNLWQHVVWRKCHSGSG |
|         |                                                      |
| KfTOC1  | TRLEGQVNEDNER-EDSRPQMS-YGSPAKFRTPPAP-----F--VPS      |
| PaPRR1  | RNHAG---PEIS-----ASH-----EL-----                     |
| MpTOC1  | RSVMDVANSKLSQ--YLLLTSTV-----KP---VLTVCTHI-----       |
| SmTOC1  | KKLKPISEEE-----EI-----                               |
| AtTOC1  | RSTNPQRGNLSHN--EWSVATA-DHLAGSHHEPMKR-----            |
| OsPRR1  | ENINQETSTSNQY--ESNPSDA-----EGGDQ-----                |
| OsPRR59 | SKTGEHSDEESDAQSSGSKREV-HALKGND DAPSGN-----LRSSDP     |



|         |                                                      |
|---------|------------------------------------------------------|
| OsPRR95 | HKNMECSEQESDAQSSCTRSEL-FSKPDHKNTEKNG-----CEKASR      |
| AtPRR7  | LNASDGSSDGSQAQSSWTKKAV-DVTMGRDLEISIR-----ESPSSK      |
| OsPRR37 | LNARDGSDNGSGTQSSWTKRAV-DDFKGKDLEIGSP-----EESSVR      |
| OsPRR73 | HNARDGSDNGSGTQSSWTKRAV-DDSMGKYLEIGAP-----NEPTTQ      |
| PaPRR3  | SKIVDGSDKGIGTQAG-----DCAMGQKLEIAIP-----VEPLQE        |
| AtPRR5  | DHVVSG--NGGDAQSSCTRPEM-----QSKQAE                    |
| KfPRR   | VNVGGSDNGSGTRNESSPVPD-QRE-----ETPER-----SRSSEK       |
| AtPRR9  | -DSRYHSDQGSGAQAI-----KETFDV                          |
| SmPRR7b | LNVGGSDNGSGTQSSWTKKPV-DRDCG-EVAMAEEK-----GGGEPS      |
| AtPRR3  | LNQDGGSDNGSGTQSSWTKRAS-----QIGTG-----SKKAE           |
| SmPRR7a | IRISDQSDTES----SCTKKVA-PKP-----CPPSR-----TDRAME      |
| PaPRR7  | LNNRDGSDNGSGTQISWTKRVV-DFAMGQDSEIAVP-----SEVATK      |
| AaPRR   | LNLRGGSDNGSGTQSSWTKRAT-EIESAHDVESVKK-----YEQCPE      |
| MpPRR   | LNVRGGSDNGSGTQTVAEHVQ--DEQMGQDLEMATR-----SGGSAK      |
| PpPRR4  | VNAQGGSDNGSGNQACMQPVQ--DGEMGHDLEMATR-----EESSPK      |
| PpPRR3  | LNAQGGSDNGSGNQACMQPVQ--DEEMGHDLEMATR-----EESSPK      |
| PpPRR1  | -----EESSLK                                          |
| PpPRR2  | LNAQGGSDNGSGNQACVQPVQ-LDSKMGHDLEMATR-----EESSPK      |
|         |                                                      |
| KfTOC1  | SGWHPNGAQHAPPPEYHRSAQGDARRGTEGGE----GSWQNSHRPPYFP-   |
| PaPRR1  | -----QK-----NVSVSPEIPIG                              |
| MpTOC1  | -----PA-----CMGPPA----                               |
| SmTOC1  | -----P-----HHQHSIPWSSS                               |
| AtTOC1  | SLHLHRGLAEKF-----GTEQ----YH----SQGETLQNGASYPH        |
| OsPRR1  | RLDS-----S-----TPPV----YH----FP-----FYYPG            |
| OsPRR59 | GKDLLVVAQTDRSHFVEINLEKQHHNGYTNHKLNEKDI FNHNSSSAFSRY  |
| OsPRR95 | DMELVHIIDNQQAHQLELSLRRSDYSRLESQEKNERRTLNHSTSSPFSLY   |
| AtPRR7  | QMHEGSSFK-LMHVEHSSKRHRGKDDGTLRDDRNVLRRSEGSFAFSRY     |
| OsPRR37 | AADLIGSMAKNMMPSELSLKRSRSTGDGANQEEQRNVLRRSDLSAFTRY    |
| OsPRR73 | TVDLISSIARSTMTSEELGLKRLKTTGSATEIHDERNILKRSDLAFTRY    |
| PaPRR3  | AIDLIGSIARKPTLLELTLRRSHPI SDGDG-VHEPHVLRHSGASAFSRY   |
| AtPRR5  | AIDFMGASFRTRIELDLSLRRPNAS--ENQSSGDRPSLHPSSASAFTRY    |
| KfPRR   | AADLIGNFVEEKMPGLELSLKRGRPAGDSSEEAAQQMRTLRLQSGGSAFSRY |
| AtPRR9  | TMDLIGGIDKRPGPELGLSLKRSCSVSFENQDESKHQKLSLSDASAFSRF   |
| SmPRR7b | CKDLLASIQKQADSALELSLKRTRVKGPDDGDGEQKRLHHSGGSAFSRY    |
| AtPRR3  | PGDLEKNAKYSVLQSLEQTLKKTRED--RDYKVGDRSVLRHSNLSAFSKY   |
| SmPRR7a | AVDLIGNIAEPSAPTLELALKSPTP----DHAYEPSYVLNQSGPSAFSRS   |
| PaPRR7  | AADLIGAIANKPLPFLELTLKRPRQNGKEDGE PEDRHVLRQSGVSAFSRY  |
| AaPRR   | PMDLTATISRQALPTLELSLKRPRAAAGDHEGETDDRRVLRQSGGSAFSRY  |
| MpPRR   | AIDLIGGIACQNMPTLELSLKRSRVPGDDDVEVEERRAVRQSGGSAFSRY   |
| PpPRR4  | IIDLINVIACQPGTSLELSLKRPRSAVGNNGGELEERQPLRHSGGSAFSRY  |
| PpPRR3  | AVDLSHRRRVQSLVKCDIELGR-----WY                        |
| PpPRR1  | AVDLINGIACQPGSMLELSLKRPRSAVDNDGDTEERQPLRHSGGSAFSRC   |
| PpPRR2  | AIDLINVVACQPGPMLELSLKRPRSAVDNDGELEERQPLRYSGGSAFSRC   |
|         |                                                      |
| KfTOC1  | -PQFAGMPGRESQLPSDLLM----PHLAMFNLP----PQSKPPQVTG----  |
| PaPRR1  | -AAAG-----SMHLC-H-GVHDV-----                         |

MpTOC1 -----PSEQIPM--MMHTH-KETL-----  
 SmTOC1 -TGAA-----L-MVHSIH-----  
 AtTOC1 -ERSR-----DGSGF-S-APNAYP-YYMH-----  
 OsPRR1 -DHGM-----HG-----  
 OsPRR59 -GNKRIELLSCEV-GAAIPYHYGAIMQPMYYPQGA-PVDL-----RKGS  
 OsPRR95 -NCRTAS-----LTFDQGPFWNGAPVASLFFYPQSA-----KTLS  
 AtPRR7 -NPASNA---IKVKH-----SSFQPL-----LPPQCGSSNVNYSVN  
 OsPRR37 -HTPVASAMKTDVKANGHTSAFHPAQH-----GAPQCGSSNVNYGVN  
 OsPRR73 -HTTVASALKTDVKATQHTSAFHVPQR-----SDAQCGSSNVNYSVN  
 PaPRR3 -NTKCNHVMPFEILYNGVPVQYGAAFPAMFHPQTCTVPNCGLSSM-ESVN  
 AtPRR5 -VHRPLQ-----SNQLNSWPGQS----SYPTPT-----GL  
 KfPRR -SMGGAMPFAFQMPFPGFPEPGFGPPHFGYYFQPQESGLAGSSRQS-ANN  
 AtPRR9 -EESKSA-----NQENI--G-----  
 SmPRR7b -SNNPLL-----VAFNDIAAAYAQSLHFFFYHGSSSTQQCGSSNVNGSVN  
 AtPRR3 -NNGATS-----KLL  
 SmPRR7a -NDQAAA-----LSYDQSLPARGGATY--YYTQPAETPGCGSTNVNGGNN  
 PaPRR7 -NTSGGQAVAIEMPYDTPRAYGSAIHPIIYYSHTGTPPLCGSSNMNGSAN  
 AaPRR -STSVVNLGKDMTYDGLSAAFGPSMHPGFYPRPGAGHRCGSSNVNGSVN  
 MpPRR -STSGVISTAFDIIYDGVCSYGPMPHPSFYSHA-----NGSVN  
 PpPRR4 -GSGGTIGMGMDLAYDGVIGTYGPAMHPMYAHPSAPRCGSTGVNGSMN  
 PpPRR3 -GSGGTIGMGMELAYDGMGGAYGPAMHPMYAHAGGAPRCGSTGVNGSMN  
 PpPRR1 -----GAPRCGSTGVNGSMN  
 PpPRR2 SDSGGTIGMGMDLAYDGVGGSYGPAMHPMYAHPSGAPRCGSTGMNGSMN  
  
 KfTOC1 GPVIGVSV-MDQAERREAALSFKRQKRKDRCFAKKIRYASRKKLAEARPR  
 PaPRR1 -----ISQVERREAALNKFRQKRKDRCFDKKIRYVSRKRLAEQRPR  
 MpTOC1 STRTTANTYFEQAERREAALNKFRQKRKDRCFEKKIRYVSRKRLAEQRPR  
 SmTOC1 -----AGVAERREAALHKFRQKRKDRCYEKKIRYASRKKLAEQRPR  
 AtTOC1 ---QHSQMSVNKLDRREEALLKFRRKRNRQRCFDKKIRYVNRKRLAERRPR  
 OsPRR1 ---QSNQLPCSRSERAAALAKFRLKRKERCFDKKVRYVNRKLLAETRPR  
 OsPRR59 -----DGDRSRREAALLKFRMKRKRKDRCFEKKVRYHSRKKLAEQRPR  
 OsPRR95 GSVCDSSS-LRHLSQREAALNKFRLKRKDRCFEKKVRYQSRKLLAETRPR  
 AtPRR7 GSVSGSGHGENKISQREAALTKFRQKRKERCFRKKVRYQSRKLLAETRPR  
 OsPRR37 GSNSGSNGLKRFTHRVAAVIKFRQKRKERNFGKKVRYQSRKRLAETRPR  
 OsPRR73 GSFSGGHNGQNGVCYREAALNKFRQKRKVRNFGKKVRYQSRKRLAETRPR  
 PaPRR3 ASEHGSNNRQNSAQREAALKKFRLKRKERCFEKKVRYQSRKRLAETRPR  
 AtPRR5 QDRDCSMDVIQQSLQREAALTKFRMKRKRKDRCYEKKVRYESRKKLAEQRPR  
 KfPRR TSGGGSNFGVDRSARREAALNKFRQKRKERNFEKKVRYQSRKRLAETRPR  
 AtPRR9 --KAASKEVRWSRSQREAALMKFRLKRKDRCFDKKVRYQSRKLLAETRPR  
 SmPRR7b GSVSGSNLNSARLTRREVALYKFRQKRKERCFEKKVRYQSRKRLAETRPR  
 AtPRR3 GSSSSSDNPSDRWAQREAALMKFRLKRKERCFEKKVRYHSRKKLAEQRPH  
 SmPRR7a GSVSGSNHGNNSKVRREAALNKFRQKRKERCFEKKVRYQSRKRLAETRPR  
 PaPRR7 GSATGSNNGINRSAQREAALTKFRQKRKERCFEKKVRYQSRKLLAETRPR  
 AaPRR GSASGSNNATTKFSRREAALNKFRQKRKERCFEKKVRYQSRKRLAETRPR  
 MpPRR GSASGSNNLQNRFARREAALNKFRQKRKERCFEKKVRYQSRKRLAETRPR  
 PpPRR4 GSASGSNTGQMRFARREAALNKFRQKRKERCFEKKI-----PKQETA  
 PpPRR3 GSASGSNTGQIRFARREAALNKFRQKRKERCFEKKIRYQSRKLLAETRPR

```

PpPRR1      GSASGSNTGQIRFARREAALNKFRQKRKERCFEKK-RYQSRKKLAEQRPR
PpPRR2      GSASGSNTGQMRFARREAALNKFRQKRKERCFEKK-RYQSRKRLAEQRPR

KfTOC1      IKGQFVRQKEG
PaPRR1      VRGQFVRQTND
MpTOC1      NRGQFVRRTSD
SmTOC1      VKGQFVRRRAEE
AtTOC1      VKGQFVRKMNG
OsPRR1      VRGQFVRQANY
OsPRR59     VKGQFVSQKLK
OsPRR95     VKGQFVRQDHG
AtPRR7      VRGQFVRKTAA
OsPRR37     VRGQFVRQAVQ
OsPRR73     IRGQFVRQSGQ
PaPRR3      VRGQFVCQAVC
AtPRR5      IKGQFVRQVQS
KfPRR       IRGQFVRQATF
AtPRR9      VKGQFVRTVNS
SmPRR7b     IKTKINDNNEA
AtPRR3      VKGQFIRKRDD
SmPRR7a     VRGQFVSQAVF
PaPRR7      VRGQFVRQTTH
AaPRR       VRGQFVRQAVY
MpPRR       VRGQFVRQTVY
PpPRR4      C-----
PpPRR3      VGAKCCIAALR
PpPRR1      VRGLFVRQAAH
PpPRR2      VRGQFVRQAVY

```

```

;
end;

```

**(c)**

```

#NEXUS
BEGIN DATA;
dimensions ntax=11 nchar=204;
format missing=?
symbols="ABCDEFGHIJKLMNOPQRSTUVWXYZ"
interleave datatype=PROTEIN gap=- match=.;

matrix
PpELF3-2    AGPALFPRHLHVAETKKAGPRGPPRNKMALYEQLTIPSHRYKMSPLPPSKK
PpELF3-1    PEIALFPRHLHVAETKKAGPRGPPRNKMALYEQLTVPSHKFKPSPMPPTNK
PpELF3-3    VGAALFPRHLHVAETKKAGPRGPPRNKMALSEQLTIPSHKFKPSPIAPSKK
KfELF3      EAAALFPRLHVSHAKRNGPRPPRNKMALYEQVTLQASHPKAAGASSRPR
SmELF3      PGGALFPRLHVKETKNAGPRAPPRNKMALYEQLTIPSHRFQQQQSDKTRA

```

|          |                                                        |
|----------|--------------------------------------------------------|
| AtEEC    | TIPPLFPRVHVNDTGRGGL-----SQQFDGKTMS----                 |
| AtELF3   | ILEPMFPRRLHVNDADKGGPRAPPRNKMALYEQLSIPSQRFGDHGTMQRKM    |
| OsELF3-1 | VMGPLFPRRLHVNDAAKGGPRAPPRNKMALYEQFTVPSHRFSGGGGSGKR     |
| OsELF3-2 | VMGPLFPRRLHVNDAAKGGPRAPPRNKMALYEQFTVPSHRFSGGGGASGRK    |
| AaELF3   | ETGALFPRRLHVKETNKVGPAPPRNKMALYEQFTIPSHRFMSSSLPAKK      |
| MpELF3   | ETGALFPRRLHVKETKRVGPAPPRNKMALYEQFTTFPSYRFVPPAVMSKKG    |
|          |                                                        |
| PpELF3-2 | GKEDDDFAVPTYSSAAETESSILEDLPLGSSCFQELLDHFGQQELWKAQK     |
| PpELF3-1 | ESLGDDFAVPTYSSAMETGSSMLENVVMGSIEFRDVVDAFGQQEFWKVQM     |
| PpELF3-3 | GSRDDEFVAPAHSSGARTGSLMLENVPTDFVQLRDVNIIFGQQGFWKTQK     |
| KfELF3   | QEEEEGCIVPAYSGPCDVESNGASAAAAAGILPKDVSVIGQHGFWKSRK      |
| SmELF3   | PRVDDVAAVPTYPSKDDSATSVVNNAPSATSKEIMSAVGDEEFWKMRK       |
| AtEEC    | --EKNQFS-PIYNTKVASNCSAIESLSGISASSYDIARVIGEKRFWKMRT     |
| AtELF3   | VREEEDFAVPVYINSDVSDDSMVDSISSIDVSPDDVVGILGQKRFWRARK     |
| OsELF3-1 | LADDDEFMVPVSVFNSDDVSDSSVECITGWEISPDKIVGAIGTKHFWKARR    |
| OsELF3-2 | LADDDEFIVPSVFSADDLSDSSVECITAWWEISPDEIVGAIKAKHFWKARR    |
| AaELF3   | HRNEDDFTVPTYVSPDDSDSMVDSITIHRI SPRHVIGAIQQEFWRTRK      |
| MpELF3   | GRINDDCTVPIYTAPEESDATMLEADPSHKITPKDLINAVGQQEFWTARK     |
|          |                                                        |
| PpELF3-2 | AIIRQQKVFVSRQVFEHRVIEVQRL LAKLPSLSFRL-SNPYAARMHMYVP    |
| PpELF3-1 | MIIRQQKLFALQVFEHRVIEVQRL LAKALCFSLHV-ANPCATRMVYVVP     |
| PpELF3-3 | VIIQQRI FSKQLFDLHRIMEVQHLLAKELCF SITV-TNPWAPRMVYVVP    |
| KfELF3   | AMQQQQKKFSAQLFEMHRLVKVQKMF AENPDFTTEQV PNPWLQNAAYY-A   |
| SmELF3   | AMQRQQTI FQKQLFELHRLTKVQHLMANSKISD----YNQWYAPL----P    |
| AtEEC    | YMINQQKIFAGQVFEHRVIMVQKMAKSPNLFLES-GNQWLVPVLVYKP       |
| AtELF3   | AIANQQRVFAVQLFELHRLIKVQKLI AASPDL LLDLDE-GQQWLIPVLIYKP |
| OsELF3-1 | AIMNQQRVFAVQVFEHRVIMVQKLI AASPHVLI ES-QNQWLVPVLVYKP    |
| OsELF3-2 | AIINQQRVFAAQVFEHRVIMVQKLI AASPHVLI EG-QNQWLIPVVLVYKP   |
| AaELF3   | AAILRQQRI FSVQVFEHRVIMVQQLMAMSPSVEYTV-VNPWLGAMYMCHP    |
| MpELF3   | IILRQQMIFASQVFEHRVIMVQQLL VGEDEEDWEE-ANGWFGALYMY-P     |
|          |                                                        |
| PpELF3-2 | YPGPCSPWGFPPWFPIIQCGVIKVV PRAVSATQESAASILLSIQKERQR--   |
| PpELF3-1 | YSGPCPPWASRWFPTLYGGVIKVV PRAVSATQESTASILLSIQTEERRR--   |
| PpELF3-3 | YPPTCSPWACRWFPIIQIGVIKAV PRAVSATLESAANILLSIQTEKWR--    |
| KfELF3   | FSNPAAQWELQLFPVKAAPIKVV PRAASET PDLGVSILKSIQERER----   |
| SmELF3   | FQFPFPV-----SHKAIKVT PRAAPVTAESA AEILHSIQKERPS--       |
| AtEEC    | FPGPCPPY-----MLRAIKAVPHNST SASESAARIFRFIQEERRDSD       |
| AtELF3   | HPGMAHTY-----VTRVIKVVPHN AKLASENAARIFQSIQEERKRYD       |
| OsELF3-1 | YSGPCPPY-----QTNVIKVVPHN SRTASESAARIFRSIQMERQRDD       |
| OsELF3-2 | YSGPCPPY-----QTNVIRVI PHNNSQTSESAARIFRSIQMERQDD        |
| AaELF3   | SAGPLVGWPLPLFPVQGGVVKVAPRAVVATPESAAGILLSIQQEERRR--     |
| MpELF3   | YPGPQAHWALPLFPLAFPGVIKVV PRAMVATAESA AEILLSIQKQRQQ--   |
|          |                                                        |
| PpELF3-2 | ----                                                   |
| PpELF3-1 | ----                                                   |
| PpELF3-3 | ----                                                   |
| KfELF3   | ----                                                   |

```
SmELF3      ----
AtEEC       HMIS
AtELF3      SSKP
OsELF3-1    ----
OsELF3-2    S---
AaELF3      ----
MpELF3      ----
```

```
;  
end;
```

**(d)**

```
#NEXUS
BEGIN DATA;
dimensions ntax=21 nchar=87;
format missing=?
symbols="ABCDEFGHIJKLMNOPQRSTUVWXYZ"
interleave datatype=PROTEIN gap=- match=.;

matrix
AtELF4      MK--GGEDPAMWENLDRNFRQVQSVLDRNRSLIQQVNDNHQSRMADNMSK
AtEFL1      MEASGVEDVEVWDTLSNGFKRAQLYLDQNRDLIQRVNHMSRI PDNVS R
KfELF4-1    MDLSTLGISKEWPG--AANFDKVQMILDQNRLLIKEINQNH CARTEGLSR
SmELF4-2    MESSLGAEGKAWGVFQRTFHQVQFLLDHNRLLIKEINVNQESQIPESLSR
KfELF4-2    MDLDTVFDPHWPGFEK-FIIVQAILDHNKLLINEINLNHERRRPEGLTR
AaELF4-1    MDE----KFNAEETFHRRFKEVECMLDHNRLLI SEINHNHETRI PERLTR
OsELF4-3    MEEDSGGGGKVQVLQRFGEVQGILEQNRVLIQEISQNH EARDADGLTR
OsELF4-2    MDGDTAEDGKVLHAFQTSFVQVQSLDQNRVLINEINQNHESKVP GDLSR
OsELF4-1    MEGDSQVDNKLIQTFHKSFVQVQSILDQNRMLINEINQNHESRAPDNLTR
AtEFL2      MEGDVQMDGKLLQNFQKSFVQVQDILDQNRLLINEINQNHESKQADHLGR
AtEFL4      MEGDVNMDGKLLQSFQKSFVDVQDILDQNRLLINEINQNHESKQPDNLGR
AtEFL3      MEGDTQMDGKILQTFEKS FVQVQNILDHNRLLINEINQNHESKIPDNLGR
PaELF4-1    MEGDTQIDGKVMQTFQKSFQVQVQNILQHNRLLINEINQNQESRTPDNL SR
PaELF4-2    MEGDAQIDGKVMQTFQKSLGQVQNILDQNRLLIKEINQNHESKMSDNLTR
PaELF4-3    MEGDAQMDSKVMQTFQKGFQVQNILDENRLLIKEINQNQESKIPDNL SR
PaELF4-4    MEGDAQIDDKVLQTFQKSFQVQVQNILDQNRLLINEINQNHESKVPDNL SR
PaELF4-5    MEGEAQIDGKVLQTFQKSFQVQVQSILDQNRLLINEINQNHESKIPDNL SR
AaELF4-2    -----MDRKALS KFHGSLSQVDFVLDHNRVLIDEINRNQEEKIPESLTR
SmELF4-1    MEADAPVDRKMWA AFERGFSQVQFLLDHNRLLINEINQNQESKVPESLSR
MpELF4      MDTDAQMDTKIWAGFHQNF SQVQYLLDHNRLLINEINQNHESKIPESLTR
PpELF4      MDRERPVD RRVSSI FNNVSRQVQFLLDHNRLLINEINQNH EAKIPEGLTR

AtELF4      NVALIQELNGNISKVVMYSDLNTSFSSGFHGTR---
AtEFL1      NVGLINEINGNISQVMEIYSDLSLNF AKKFDQ-----
KfELF4-1    NVLLIRELHSNVAKVVELYREISESFVVVFGN--VQ-
SmELF4-2    NVMLIKELNYNIKR VVELYAGLPTSFIRSFSNLKARS
```

```

KfELF4-2      NVQLIRELNENVTKVMKLYEELSQAQFVQSFQK--GQK
AaELF4-1      NVTLIRELNHNILKVVGMYSDL SAVFEKSFENAKMRI
OsELF4-3      NVALIRELNTNIARVVDLYANLSGFSRSVTASKSRA
OsELF4-2      NVGLIRELNNNIIRRVVDLYADLSSLFAASSPAHKVRS
OsELF4-1      NVGLIRELNNNIIRRVVGLYADLSASFARTMDAQKVRP
AtEFL2        NVGLIRELNNNIIRTVASLYGDLSHSFARSVDAQKFRS
AtEFL4        NVGLIKELNNNIRRVASLYGDLSHSFARSVDAQKFRS
AtEFL3        NVGLIRELNNNVRRVAHLYVDLSNNFSSMEANRIRP
PaELF4-1      NVGLIRELNNNITRVVDHYAGLSTSFTKSIETQKFRT
PaELF4-2      NVTLIREFNNNITRVVDLYAGLSTSFTKAIETQKFR-
PaELF4-3      NVALIRELNNNITRVVDVYAGLSTSVTKAIETQKFR-
PaELF4-4      NVALIRELNNNITRVVDLYACLSTSVTKEIET-----
PaELF4-5      NVSLIRELNNNISRVDLYSGLSTSFTKAVETQKFRP
AaELF4-2      NVSLITELNQNKKVVDLYSGISSSFASFQK-----
SmELF4-1      NVVLIKELNKNIGQVVSLSYTISSSFVKSFENHKVRS
MpELF4        NVLLIRELNNNITKVVDLYASLSVSVFKLFDNMKARS
PpELF4        NVMLIRQLNSNIGKVVDLYANLSSNFS-----

```

```

;
end;

```

**(e)**

```

#NEXUS
BEGIN DATA;
dimensions ntax=13 nchar=176;
format missing=?
symbols="ABCDEFGHIJKLMNOPQRSTUVWXYZ"
interleave datatype=PROTEIN gap=- match=.;

matrix
KfLUX-1      MSRESISKVTLGLGSGEDLTSLEQELLTLDLAGSLAGSSVEQAI AAEAV
KfLUX-2      --KEITRRWGVGIPSP EELAPLSTR LITPVLACAFNIEGDSGASEEEVDE
AaLUX        -----MQLGVS-----
AtBOA        MGEYRIPEWEIGLPNGDDL TPLSQYLVP SILALAFSMIPERSRTIHDVNR
OsPCL1       MGDERM EWETGLPGADEL TPLSQPLVPAGLAAAFRI PPEPGR TLLDVHR
PpLUX2       --DDQVSDWTKGLPTSEEL TPLSHTLISRI LASAFRIKHEEPMTEEDVRR
PpLUX1       -----
PpLUX3       MHGDHVVEWNPGLPTGEEL NPTSKSLISLV LASGLSMKPEPLKTAADVSG
MpLUX        MANNRVREWEAGLPSASDL TPLHHS LITRVLARAFCIPTNATPSAADVLQ
PaLUX        --EDWLKGWEDELPSPEEL MPLTQNLITPD LAAAFKIHPSASASAP---
AtLUX        MGGDRVSEWEMGLPSDEDL ASLSYSLIPPNLAMAFSITPERSRTIQDVNR
PaLUX2       --DDRVTWEW EAGLPGDEL TPLSQVLITPELACAFSISPEPCRSQLDVSR
PaLUX2       --NDRVEEWE EGLPTPEEL TPLNQSLITPELASAFSISQEAAKSSSDVLH

KfLUX-1      PGEGAQAGQAGGTEGEEQEGRGQGNKKQRLVWTAELHSR FMNAVNH LGVK
KfLUX-2      AALNTVTPSQEGMEHTSDDPPGRALKRPRLVWTPQLH KRFCDAVNH LGVE

```

```

AaLUX      -----GGPENSNEEPNARTLKRPRVLVWTPQLHKRFVDAVGHLGIK
AtBOA      ASQITLSSLR-----GPEDASGKTSKRPRVLVWTPQLHKRFVDVVAHLGIK
OsPCL1     ASAATVSRLRGGADGGNGNTNNSSSKRARLVWTPQLHKRFVEVVAHLGMK
PpLUX2     ESQATIHNLFGGMLNSNDE----PLKRARLVWTPQLHKRFVEAVGHLGIK
PpLUX1     -----GGPVNSNEEANARTLKRPRVLVWTPQLHKRFVDAVGHLGIK
PpLUX3     ESRASFLDSQGGPVNSNEETNARTLKRPRVLVWTPQLHKRFVDAVGHLGIK
MpLUX      ASKSTVQQLQDCP----DGNTARTLKRPRVLVWTPQLHKRFVDAVGHLGIK
PaLUX      -----GVTENVG-EEPARTLKRPRVLVWTPQLHKRFVDAVAHLGIK
AtLUX      ASETTLSSLR-----GTEDLSGKTLKRPRVLVWTPQLHKRFVDVVAHLGIK
PaLUX2     ASKNTMSALRSGFENS SDEHSARTLKRPRVLVWTPQLHRRFVDVVSHLGIK
PaLUX2     ASIATVTALRGGPENS GEEPAARTLKRPRVLVWTPQLHKRFVDAVAHLGIK

```

```

KfLUX-1    NAVPKTILQLMNVEGMTRENVASHLQSAPAPARPPHACKYRLYLKRLAG
KfLUX-2    NAVPKTIMQLMNVEGLTRENVASHLQ-----KYRLYLRQFQT
AaLUX      NAVPKNIMQLMNVEGLTRENVASHLQ-----KYRLYLKRMMSG
AtBOA      NAVPKTIMQLMNVEGLTRENVASHLQ-----KYRLYLKRIQG
OsPCL1     NAVPKTIMQLMNVEGLTRENVASHLQ-----KYRLYVKRMQG
PpLUX2     NAVPKTIMQLMNVEGLTRENVASHLQ-----KYRLYLKRMQG
PpLUX1     NAVPKTIMQLMNVEGLTRENVASHLQ-----KYRLYLKRMQG
PpLUX3     NAVPKTIMQLMNVEGLTRENVASHLQ-----KYRLYLKRMQG
MpLUX      NAVPKTIMQLMNVEGLTRENVASHLQ-----KYRLYLKRMQG
PaLUX      NAVPKTIMQLMNVEGLTRENVASHLQ-----KYRLYLKRMQG
AtLUX      NAVPKTIMQLMNVEGLTRENVASHLQ-----KYRLYLKRMQG
PaLUX2     NAVPKTIMQLMNVEGLTRENVASHLQ-----KYRLYLKRMQG
PaLUX2     NAVPKTIMQLMNVEGLTRENVASHLQ-----KYRLYLKRMQG

```

```

KfLUX-1    LPPNARMMAPPLHQGYPPPPPHRMQP
KfLUX-2    DAPAVPSSSDAVFANGPQPPRGGAHG
AaLUX      VPTDGP GANDQLFASTPLPPNLGLFP
AtBOA      LTTEEDSSSDQLFSSTPVPPQSFVND
OsPCL1     LSNEGSPSPDHIFASTPVPHA-----
PpLUX2     LSNDGPSASDHLFASMLPPGIMLFP
PpLUX1     LPSDGPMANDQLFASTSLPSNLGLFP
PpLUX3     LSSDGPPANDQLFSSTPLPPNLGLFP
MpLUX      LSNEGPSASDPLFASAPLPPNLQFA
PaLUX      LSSEGPSASDQLFASTPVPPS--LFP
AtLUX      LTNEGPSASDKLFSSTPVPPQSFANE
PaLUX2     LSNEGPSLSDHLFASTPVYPYNA---
PaLUX2     LSSEGPSASDHLFASTPVP-----

```

```

;
end;

```

**(f)**

```
#NEXUS
BEGIN DATA;
dimensions ntax=9 nchar=1001;
format missing=?
symbols="ABCDEFGHIJKLMNOPQRSTUVWXYZ"
interleave datatype=PROTEIN gap=- match=.;

matrix
CcGI      -----MAFVDLLLQ
CiGI      PGDDQDRSEDDLPKLRWLQGLVSSSLRPPPSNNQQRQVEVLAYTELFQ
AaGI      -----MSVARPEWLLGLQSSSLFRPPPRNPHERQMEILGYLELMVQ
PaGI      -----MSISEQKWIHGLQSSSLFRPPPQDAQQRQAEILAYVELFAQ
AtGI      -----SSSSSERWIDGLQFSSLLWPPPRDPQQHKDQVVAYVEYFGQ
OsGI      -----MSASNEKWIDGLQFSSSLFWPPPQDSQQKQAQILAYVEYFGQ
MpGI      -----MSFPGQKWLRLGLQSSSLFRPPPESAIRKQAEILASVELFGH
SmGI      -----MSSPQQKWLTLGLKSTSLFRAPPLDLHERQTKTVAYVELFGQ
TlGI      -----RQQWLRGLKSSSLYRPPPANRHQRQTEVLEYVELFGQ

CcGI      LSQDLFAHVIAELIRLQYPREHPILLDDVLASIVLHSPHEGHAILHVLLS
CiGI      FASELLSDDISQLVRNHYPQNSSTLLDDVLATFVLHHPEHTDAVLHALLS
AaGI      FASESFVDEMNELVRSHYPKEEACLVDVLAFAFVLHHPEHAHAVLHALLS
PaGI      FTS-EFPDDIAELVHSHYPNGEASLLDDVLAIFVLHYPEHGHAI IHPLLS
AtGI      FTS-QFPDDIAELVRHQYPSTEKRLDDVLAMFVLHHPEHGHAVILPIIS
OsGI      FTADQFPEDIAQLIQSCYPSKEKRLVDEVLATFVLHHPEHGHAVVHPILS
MpGI      FASESFVDDIGELVRAHYPTNEHCLDDVLATFVLHHPEHGHAVLHALLS
SmGI      FASDSFPEDIAELVRDHYPHKEPCLDDVLATFVLHHPEHGHTILHPLLS
TlGI      FASDAFVDDIGELVRGHYPSEEVCLDDVLATFVLHHPEHGHAILHALLS

CcGI      SLVHGNLRYSRGISPFSAFVAIFSPSSQRACPEQYELACAEVLQLLTHYN
CiGI      CIIDGSLEYSRKSPFFGSFVALFNTSTERMGLRQWALACTEILRVLTHYN
AaGI      CVIDGTLLYSKEGSPFRCFIALFSSANEKHFSEQWAVACGETLRLLTHYN
PaGI      CIIDGTLIYDKKMSPFSSFNLSFSPSENDDYSEQWALACGEILRVLTHYN
AtGI      CLIDGSLVYSKEAHPFASFISLVCPSENDDYSEQWALACGEILRILTHYN
OsGI      RIIDGTLSDYDRNGFPFMSFISLFSHTSEKEYSEQWALACGEILRVLTHYN
MpGI      CVIDGTLIYNKKTTPFGSFVSLFSPSTERDFSEQWALACGETLRVLTHYN
SmGI      CVIDGTLAYSKTTPFGSFVSVFGVSSERDLTEQWALACGEILRLLTHYN
TlGI      CVIDGTLIYDKKTTPFGSFVALFSPSSEREFSEQWALACGETLRILTHYN

CcGI      RPVQRTSS-----GRVAPERVLTQWITDCLLASPLGFRRDYFRWCGGV
CiGI      KPVHKNRQEEDTNNNERRDAFRPLTMWITDCLLAAPSIMRTNYFRWCGGV
AaGI      RPVYKSDP-----EKRVPSRLLTPWITDSELLAAPLGVRSDYFRWCGGV
PaGI      RPVYKVDR-----QDKKPLRLLTPWITDILLAAPLGIRSDYFRWCGGV
AtGI      RPIYKTEQ-----HERKPLRPLSPWISDILLAAPLGIRSDYFRWCSGV
OsGI      RPIFKVDH-----PDRKPLRPLSPWITDILLAAPLGIRSDYFRWCGGV
MpGI      RPTFRSDT-----DRRSPTRLLTPWITDSELLAAPPSIRSDYFQWCGGV
SmGI      RPIYKSES-----GRRAPKRLTPWITDSELLAAPLGTKSDYFRWCGGV
```



TlGI RPTYKAET-----EKRVPTRLLLTPWITESLIAAPLGIRSDYFRWCGGV  
  
 CcGI VGQYATSGDLHPLPSP--SGPGKHPQMLPSTPRWAVANGAAVIVSVCDDDE  
 CiGI TGKYAAVGALRPPTTVLGNQGKAPQLQPSTPRWAMANGAAVILAVWDDE  
 AaGI MGKYAAGVDLKPSTVGLGQKQPQLLPSTPRWAVANGAAVILSVCDDDE  
 PaGI KGKYAAGGELKPPTTAGGRGPGKHPQLMPSTPRWAVANGAGVILSVCDDDE  
 AtGI MGKYAAG-ELKPPTIAS-RGSGKHPQLMPSTPRWAVANGAGVILSVCDDDE  
 OsGI MGKYAAGGELKPPTTAYSRGSGKHPQLMPSTPRWAVANGAGVILSVCDEE  
 MpGI MGKYTAGHEELRPPTTAGGRSQKQPQLLPSTPRWAVANGAAVILSVCDDDE  
 SmGI LGKYAGGGDLRPPTTGDKGKGKHPQLLSSTPRWAVANGAAVISSVCDDDE  
 TlGI MGKYAAGVELRPPTTAGGRGQKHPQLLSSTPRWAVANGAAVILSVCDEE  
  
 CcGI VARWGSVELTAAAVPALLLPPP--EVDEHLI-GLPPLEPFARLFHRYYAC  
 CiGI VTRFGTADLTAAAVPALLIIPPDHDDDDARAVVALPPLEPYTRLFHRYYTM  
 AaGI VERYRSAHLTAAAVPALLLPPEPAALNNPLVAGLPPLEPYAQLFHRYYAI  
 PaGI VTRYETANLTAAAVPALLLPPPTTALDEHLVAGLPPLEPYACLFHRYYAI  
 AtGI VARYETATLTAVAVPALLLPPPTTSLDEHLVAGLPALEPYARLFHRYYAI  
 OsGI VARYETANLTAAAVPALLLPPPTTPLDEHLVAGLPPLEPYARLFHRYYAI  
 MpGI VSRYETADLTAAAVPALLIIPPTAQENLLVSGLPFLEPYAHLFHRYYAV  
 SmGI VLRYETADLTAAAVPALLLPPPSTSLDEHLVAGLPPLEPFARLFHRYYAI  
 TlGI VMRYETADLTAAAVPALLLPPPATALDQHLVAGLPPLEPYARLLHRYYAI  
  
 CcGI ATSGATQRLLLGLLEALPLRAPDALDAAVQLVELLRS AEDYGSACQLPPN  
 CiGI GAPVATQRLLLGLLDVGPPLAADAMEAAVQLIHLIRS-EDFGGPKLPPS  
 AaGI ATPEAAQRLLLGLLEAPSSWAPDALDAAVQLVLLRS AEDLSSTFQLPQT  
 PaGI ATPSATQRLLLGLLEAPPSWAPDALDAAVQLVELLRAAEDYASTMRLPKN  
 AtGI ATPSATQRLLLGLLEAPPSWAPDALDAAVQLVELLRAAEDYASGVRLPRN  
 OsGI ATPSATQRLLEFGLLEAPPSWAPDALDAAVQLVELLRAAEDYDSGMRLPKN  
 MpGI ATPGATQRLLEFGLLEAPPTWAPDALVVAVALVELLRAADNYTSSVQLPRD  
 SmGI ATPGATQRLLLGLLEAPASWAPDALDAAVQLVELLRAAEDYSSSFRLPEN  
 TlGI ATPGATQRLLLGLLEAPPSWAPDALDAAVQLVELLRAAEDFSSSVQLPRS  
  
 CcGI WLHLHFLRPIGVAMAKQSGAASDAAAALLFRIFSQPVLLFPTPGHAQGGL  
 CiGI WLDLHFLRPIGVAMSSRAAVMASAASALLFRIFSHQTLFFPPPL-APLPD  
 AaGI WLHLHFLRPIGSAMARQSGVIADAAAALLFRIFSQPVLLFPPRGHAQGV  
 PaGI WLHLHFLRAIGTALS MRV GIAADTAAALLFRITLSQPALLFPPPRLAQGVD  
 AtGI WMHLHFLRAIGIAMSMRAGVAADAAAALLFRILSQPALLFPPLSQVEGVE  
 OsGI WMHLHFLRAIGTAMSMRAGIAADTSAALLFRILSQPTLLFPPLRHAEGVE  
 MpGI WLTIHFLRPVGAAMAQRSGTAADAAAALLYHIFSRPALLFPPPSQSQGLF  
 SmGI WFRHLHFLRPMGAAMTMKQGIASDAAAALLFRILFSQPALLFPPRGHAQGAQ  
 TlGI WLHLHFLRPVGAAMTVRSGIAADAAAALLFRIFSQPALLFPPP GH AQGVR  
  
 CcGI AGRFVVKEQAAAAQANDDATA LGLASLLVDHGAEVEWRICALWEAAFGLL  
 CiGI TSSLRMQMQLVHL-ASEEATARGLAALMCSHGPDVEWRICSVLEAAYGLT  
 AaGI VIPFRDEIEMAAVQANGQATACALALMTEHGPDVERRVCALWELSYGLQ  
 PaGI VQCSGEEIEMETYQASIEATAQGVASLMCLHGPEVEWRICTLWEAAYGLL  
 AtGI IQHYRKQIEVPAEATIEATAQGIASMLCAHGPEVEWRICTIWEAAYGLI

|      |                                                          |
|------|----------------------------------------------------------|
| OsGI | LHHYKRQLEVPASEATIDATAQGIASMLCAHGPDVEWRICTIWEAAYGLL       |
| MpGI | STQSREEAKAAAAQESEVATASGLAALLTGHGIDVECHICAIWEAAYGLR       |
| SmGI | VVQFHAQMEALATQVNEEATAKGVASLMRDHGRDVEWRICVLWEAAYGLI       |
| TlGI | INQIQEVADAAAAQANEATAQAVAALMCTHGLDVEWRICALWEAAYGLL        |
|      |                                                          |
| CcGI | PPQSSSQVLP LLVANLAI VPPVLSWNVLRPLL RVFEHLPPNSPSQSSLGR    |
| CiGI | PVDSTVIALSHVGGI SEVRHVLSWNLFRPLLHLFEHLPPGGPSHACLRR       |
| AaGI | PVDLSVVNVLPQLDMVTPLQPPVLSWNL FHPLLRVMEHLRRGTRSQA CLRR    |
| PaGI | PLSSSTVDLPEIIVVATPLQPPVLSWNL FQPLL RVLEYLPRGSPSEASLMR    |
| AtGI | PLNSSAVDLPEIIVATPLQPPILSWNLYI PLLKVLEYLPRGSPSEACL MK     |
| OsGI | PLSSSAVDLPEIIVAAPLQPP TLSWSLYLPLLKVFEYLPRGSPSEACL MR     |
| MpGI | SLTPSSVDLPDLV LSTPLQPPVLSWNL LRALFRILSYLPPESPSQA CLKR    |
| SmGI | PLDKSVVDLPEMVIATPLQPP LLSWTLFRPFLRVLEHV PKGCQSQTCLRR     |
| TlGI | PLNSSKVDLPELVVATPLQPP FLSWNLVRPLL RVMEYLPRET PSLVCMRR    |
|      |                                                          |
| CcGI | IFSATVDGILERTFQSD ESAGARLVGMTEL RALVHHLFTEPCPSPALASK     |
| CiGI | IFSATLSSVLF RSPFLTGHPPQQTQPLQQQNDQQQALHHHHHHHHDL LSP     |
| AaGI | VFSATVEAIVQRTFPCEENAGAKNVGMAELRAMVHCLFTEACPSPDVAAC       |
| PaGI | IFTATVQAILQRTFP AEQSPTSKNLAVAE LR TMVHSLFTE SCVPI DLASR  |
| AtGI | IFVATVETILSR TFPPESSATKNLAMSELRAMVHALFLESCAGVELASR       |
| OsGI | IFVATVEAILRRTFP SETSSQSKNLAVAE LR TMIHSLFVE SCASMDLASR   |
| MpGI | IFSATVEAILQRTFP LDEVAGAKSVGMGELRAM LHCLFTE SFLSPELA AH   |
| SmGI | IFSATVDAILRRTFP LDDWSGVD PAGMAELRALVHCLFTE AFLGPALASQ    |
| TlGI | IFSATVEAILQRTFP SGEVAGAQSVGMAELRAM IHCLFTE SCPSPD LGSQ   |
|      |                                                          |
| CcGI | LFTRLLTSCLAYDAAI SARSVIGVATQVGRKGRREVCAGGVGSIRMGNGG      |
| CiGI | LQFPLPLHSSSSSSSFP--K---PPATVQ---LPAAWPLA-----WPPPS       |
| AaGI | LLADALLLCLSHDAKWRGADDRGAVATFDSYLVAAMCALACEVQMVAFSR       |
| PaGI | LLFMVITVCLSHDAVQKAKKERGAVATFGSYILAAVCAQACEVQLFSFTS       |
| AtGI | LLFVVLTVCVSHEAQSSNVKGGQPVA AFDSYVLAAVCALACEVQLYPMIS      |
| OsGI | LLFVVLTVCVSHQALPGCKKRQGPVATFDSYVLAAVCALSCELQLFPFIS       |
| MpGI | LLSEALSCLSHDASRQSGKQRGAVATFDSYVIAAVCALACEVQFFPFSP        |
| SmGI | LLSDALTVCLSHD TLRQSNKDRGAVASFDSYLIAAVCALACEVQLCTFSA      |
| TlGI | LLSDVLTVCLSHDTQSLVSKGRGAVAKFDSYVIAAICALACEVQLLSLPR       |
|      |                                                          |
| CcGI | VRSGE GGGQE GGSQE FPSREMGA VGDGQAFPFRETEAAGEGVTGDEMSSG   |
| CiGI | PTHT-EHGPPPYHHHHPLHT-----HTPSVFSSPPAAENRSATQKMLATP       |
| AaGI | STSS-FPALSNGTPVGIQQAKRVLELLERLLAEVPSLAEQSSSSDIVGDG       |
| PaGI | PMVN-VEGPPNGFYSAVNHTRRL LGILEALLSLKPSAAGCYSSSEI IAAA     |
| AtGI | GGGN-SKEYGAGIDSAISHTRRILAIL EALFSLKPSSVGTYSSEI VAAA      |
| OsGI | KNGN-SNELHNSISSAILHTRRILGILEALFSLKPSSVGTYSSEI VAAA       |
| MpGI | AYFT-SNRFPIGVANVLEHTKRL LGLLELLLVSPSFA GTTSTNEILGQA      |
| SmGI | ADGT-----GVTNSAYQARRLMSVLEGLLVVEPFSPGVNSPNDLVEAA         |
| TlGI | SMFT-PNVYPVEVAVAADHTRRVLG LLESLLALVPSSHGTSSSGEIVAAA      |
|      |                                                          |
| CcGI | SGGAQIETKSGPATGMANGAQEMTKTGGSPSFQKRKRSRESKSVRGARGV       |
| CiGI | STLTS LPLLPPGLLFL LLLLLLL LQTRLPWPPS LLLSFRPYHHHHHHPPPSL |

AaGI ISAAHISGVLGKSKACLQALAGVVRCKWDSEVCTRASHALELVQACVQTM  
 PaGI MVAAHVSDLLGRSKACMHALSVMRCKWDSEL CARASTVLALIDVNRKAV  
 AtGI MVAAHISELFRRSKALTHALSGLMRCKWDKEIHKRASSLYNLIDVHASKVV  
 OsGI MVAAHVSELFRRSRPCLNALSALKQCKWDAEISTRASSLYHLIDLHGKTV  
 MpGI VGAAHMSDLLGHSRACLHSLTGIMRCKWDPGICLKASAVLSAIESNGDLV  
 SmGI IVAAHISRLLGRSRACTHALTAIVRCKWDPGVSSKAASILALVDGNDKAV  
 TlGI VVAAHMSGLLGRSNACIHSLTAIMRCKWDPGIQEKAASVLALVEGNGDVV

CcGI KGAARARRGGLTSC-AAFMSRSRSGSPLQLGADADSACQD-KVGALMLL  
 CiGI LLLLLLAAAGGGGA-VDSGVVAESGGGSVNASDVAMLLCRNWPGGSLMAL  
 AaGI VEVTSSAPTSNTEP-HPSGLGKGVGGPSSRLGALRSQSSMQWSSGPIRVI  
 PaGI ASIIDKSESSVSHV-E-DVSGKVIANLSMDGSDVVSLLTVDNVGNFVTAV  
 AtGI ASIVDKAEPLAAYLTRDEGSEKGIKDFLLDASDLANFLTADGTQKLLRSV  
 OsGI TSIVNKAEPLEAHL-ELNGSGKAIASLQVEASDLANFLTMDGSQTLLRSV  
 MpGI AIATHGRNGFGGPD-GPNGVGEARGSFPLEASDVASLLCKDTLDTSLKSV  
 SmGI EAVFNYADKLSGDE-AISGDGVKDASLSLNASDVTNLLCG-TVSDLLKAV  
 TlGI ATAVHASNEYMSKD-RINGMGKEIANLPLDAADMASLVCKDNVSASLKL

CcGI LMSQQDTAVAAVPLLWQRLVRLPEVSVSQEGTSARRGWRQVAEALCNLVV  
 CiGI LMEKQQLALAAVPLLWQRLMCAPEVPLSTEGTSAEKGWRQVLEGLCNIVV  
 AaGI LTEKDELVISSVPVIWRLLLLAPDSTNIMDGASPRQGWRQVVEALCKLVE  
 PaGI LEEKQDLCVASVPLLWQRLITAPEMQMSVESTSAKQGWRQVVDALCNIVL  
 AtGI LAEKPELSFSVVSLLWHKLI AAPEIQPTAESTSAQQGWRQVVDALCNVVS  
 OsGI LSEKQELCFSVVSLLWQKLIASPEMQMSAESTSAHQGWRKVVVDALCDIVS  
 MpGI LVGKQHLAIGATALLCQRLILAPDIPNAIEGTS AERGWGQVVEALCNISA  
 SmGI LKQKRDLAVAIVPLLWQRLMSAEELPTSKEGTS AKQGWRQVVDVAVCNVVL  
 TlGI LTEKWQLAVAAVPLLWQRLIFAPEIPVSSEGTSAKRGWRQVVEAICNVVV

CcGI AFPGKAASAILAQAERDLKPWMPEVATAASPDWSVNTRIMSLLAELIQQR  
 CiGI AFPLQA AVAIVAKAEGELRPWEAEEDVGGDGVCRGNVRIVSLLAEMRLR  
 AaGI TFP GKATSAILLQVQDLSSWGDQSDMRVENVRKVNRRIVTILVELLRLK  
 PaGI ASPAKAATAIVVQAERDLQPWVARHDSQGGQIWRNLNQRIVSLLAE LLRYH  
 AtGI ATPAKAAA AVVLQAERELQPWIAKDDEEGQKMWKINQRIVKVLVELMRNH  
 OsGI ASPTKASAAIVLQA EKDLQPWIARDDEQGQKMWRVNRIVKLI AELMRNH  
 MpGI AFPGKVARFVVSQAEAE LRPWTVKDDGPSQSLWRINTRVVCLLSDLLRLT  
 SmGI TYPEKATS VVLLQAERGIQPWIIIGDG--GEEKWRMNTRIVFLLSELLRLN  
 TlGI GLPAQAAAAIVVQAERDLHPWTGRDDLQVQTVWRVNRILSLLTELLRLH

CcGI RSREAVTAVACESSLLLRATDGIALAGVEGTL PQLELLEAVSVAARSAQA  
 CiGI QCPAAVGVVAHAHALHRATAGIGIEGEACTLPQLELLEAAATAADVARH  
 AaGI HCPEAIQLAAKSSDLLLRATDGLELEEDAYVLPQLELLEAANIAVQRSL  
 PaGI NAPEALMVLANASDLLMRATDGMLVDGEACTTPQLELLEAMAVTAQLSLG  
 AtGI DRPESLVILASASDLLLRATDGMLVDGEACTLPQLELLEATARAIQPVLA  
 OsGI DSPEALVILASASDLLLRATDGMLVDGEACTLPQLELLEVTARAVHLIVE  
 MpGI HLPEIVKVVVHDGALLRRATDGMTLDGEACKLPQLELLEAAALAAQAALK  
 SmGI D-PQVLGLIANAGTLLYQATDGMSVDGEPCTLPQLELLEAIAMA IKS LCA  
 TlGI TSLEAVKVVVQSSDLLHRATDGMVTEGEACTLPQLELLEAAAMAVQVLLR

```

CcGI      WPIGGCQVAGKLLDLLKVRIPSLVKCVCHENAHVRLATSLLQTI LDTPD
CiGI      WE-GGHSVTNELLEFMLKERLPVTVRCLSSSSTHVRLAMALLRH LAYEAV
AaGI      WDSNSGVGAQKLVAVLKDRIPGAVRCLSHCCVDARVLSQTF LQDLRVADS
PaGI      WGVPGKAMAEGLWNLLKYRLPATVQCLSHSSAHVRLSTSV LRDILHAES
AtGI      WGPSGLAVVDGLSNLLKCRLPATIRCLSHPSAHVRLSTSV LRDIMNQSS
OsGI      WGDSGVSVADGLSNLLKCRLSTTIRCLSHPSAHVRLSMS VLRDILNSGQ
MpGI      WEEPNEEVADQLFSLRERLPATVVRCLSHNSTHV RAMSVARLRDMLYMES
SmGI      WKVSS----RLLILLKERLPAIVRCLSHDSPRIRASSAS LLREIVSTDV
TlGI      SEVSGKNALDKLLLLLLKDRLPAIVRCLSHSSAHVRLS MAALLRDMLYAES

```

```

CcGI      SPMAASWQAAVERAVSLEVSDRQRHGLEVRILEEVSFALGC NT-C-----
CiGI      LAARCEWRRAVEQCLSWEAHFRRSGGLSTTLLVDAASTL GCQIAV-----
AaGI      VRLLDWKRAVEEALFMEAQHRRARLSLTSLAAAATV LGSTIPN-----
PaGI      LNFVQDWNKAVEQCLAWEAHNRQARGMSIAL LALAANALGFSAN-----
AtGI      IPISIDWKADIQNCLNWEAHSLLSTTMPTQFLDTA ARELGCTISL-----
OsGI      INSIINWQADVERCIEWEAHSRRATGLTLAFLTA AAKELGCPLT-----
MpGI      LRSTGNWRRYVEQCVVWEKFGSSASS-TIQIVEEY LSRFGTSVWIWWEKL
SmGI      LRAAGAWLEDVEQSIAWETHYRRAEGLSE SFLASAAIALGCKLPP-----
TlGI      LQGEDDWRRAVEKCVWEAYYRRATGMSTS LLANAASSLGC SLP-----

```

```

CcGI      -
CiGI      -
AaGI      -
PaGI      -
AtGI      -
OsGI      -
MpGI      I
SmGI      -
TlGI      -

```

```

;
end;

```

**(g)**

```

#NEXUS
BEGIN DATA;
dimensions ntax=12 nchar=559;
format missing=?
symbols="ABCDEFGHIJKLMNOPQRSTUVWXYZ"
interleave datatype=PROTEIN gap=- match=.;

matrix
KfZTL      MEDRIEVLHSSPHGLIVTDALAEDHPITYVNTIFQYYTGYDAESILGRNC
AtFKF1     HAIVGMFYPMTPPSFIVSDALEPDFPLIYVNRVFEVFTGYRADEV LGRNC
OsFKF1     GDRDEAAAEGRAAAIVSDAVEVDFPVIYVNAAFEAATGYRADEV LGRNC

```

|        |                                                       |
|--------|-------------------------------------------------------|
| AaZTL  | MDGRVKMLQTSPCALVVTDALDQPVIIYVNSIFEHATGYKAEIILGRNC     |
| AtLKP2 | MEWPVGSGLGTAPCGFVSDALEPDNPIIYVNTVFEIVTGYRAEEVI----    |
| SmZTL  | -----MLGPCSVVVTDALDVFDPPIIYVNNIFEFITGYKAEIILGRNC      |
| OsZTL1 | MEWAIIEGV--GACGLVSDALEPDFPIIYVNRGFEDATGYRAEEVLGRNC    |
| OsZTL2 | MEWAIIEGMASGPCGLVVTDALDPCPIIYVNCGFEEATGYRAEEVLGRNC    |
| PaZTL  | MEWAMDNLHSTPCGFAVTDALDQPIIYVNAVFEYVTGYKAEIILGRNC      |
| AtZTL  | MEWPVGNLHTAPCGFVVTDAVEPDQPIIYVNTVFEMVTGYRAEEVLGGNC    |
| MpFKF1 | --MRLEVLHSSPCGLIVTDALDQPIIYVNTVFEFITGYKAEIILGKNC      |
| TlZTL  | MDWRLEMLHSSPCGLTVTDALEPDQPIIYVNTVFEFITGYKAEIILGRNC    |
|        |                                                       |
| KfZTL  | RFLQMRGEFADKRHPAVDLKTVRKMREAIAAGQEFKGE LLNFKKDGTPLI   |
| AtFKF1 | RFLQYRDPRAQRRHPLVDPVVVSEIRRCL EEGIEFQGE LLNFRKDGTP LV |
| OsFKF1 | RFLQFRDPRAQRRHPLVDPMVVSEIRRCL NEGIEFQGE LLNFRKDGAP LY |
| AaZTL  | RFLQNRGPFAQRRHPLVDATTISEIRRCISEGVEFEGE LLNFRKDGTP LI  |
| AtLKP2 | -----GPFTKRRHPMVDSTIVAKMRQCLENGIEFQGE LLNFRKDGSP LM   |
| SmZTL  | RFLQFRGPFAQRRHPLVDSATVTEIRRCMREGIEFWGE LLNFRKDGTP LM  |
| OsZTL1 | RFLQCRGPFAKRRHPLVDTTVVTDIRRCLEEGTVFQGD LLNFRKDGSP FM  |
| OsZTL2 | RFLQCRGPFAQRRHPLVDAMVVSEIRKCIDNGTEFRGD LLNFRKDGSP LM  |
| PaZTL  | RFLQYRGPFAQRRHPLVDSMVVSEIRRCLDEGVEFQGE LLNFRKDGTP LM  |
| AtZTL  | RFLQCRGPFAKRRHPLVDSMVVSEIRKCIDEGIEFQGE LLNFRKDGSP LM  |
| MpFKF1 | RFLQCRGPFAQRRHPLVDPTTVATIKRCLTEGVEFRGE LLNFRKDGTP LM  |
| TlZTL  | RFLQYRGPFAQRRHPLVDSTVVSEIRRCIRGEVEFRGE LLNFRKDGTP LI  |
|        |                                                       |
| KfZTL  | NNLLMTPIHGEDGIVTHFIGIQSFRPIKMDLGPLPERPWKDSRHNP AVFA   |
| AtFKF1 | NRLRLAPIRDDDGTITHVIGIQVFSETTIDLDRVSYPVFKHHEDFCGILQ    |
| OsFKF1 | NRLRLIPMHGDDGFVTHVIGIQLFSEANIDLSNVSYPVYKQSSEYCCILQ    |
| AaZTL  | NKLFLTPILDDEGAVTHVIGVQSF AEAKIGMGPLSNAILKERSSTCGLLQ   |
| AtLKP2 | NKLRLVPIREED-ITHFIGVLLFTDAKIDLGPSPDLSAKESRGLCGIFE     |
| SmZTL  | NKLCLKPIRGEDGRITHIIGIQSFSEVKLDLGPLPPPLWRNSKDRCGILR    |
| OsZTL1 | AKLQLTPIYGDEDETI THYMGMQFFNDSNVDLGPLSVSTTKECSEHSDLFL  |
| OsZTL2 | NKLHLTPIYGDEDETI THYMGIQFFTNANVDLGPLPGSLTKECREYSSLFQ  |
| PaZTL  | NRLRLTPIHGDDGIIITHIIGIQLFTEANIDLGPMPLPFYKECREICGIFQ   |
| AtZTL  | NRLRLTPIYGDDDTITHIIGIQFFIETDIDLGPVLGSSTKESRGMCGLFLQ   |
| MpFKF1 | NKLCMTPIIHAEDGTITHVIGIQSFTEAKLDLGPPIP---WKDSKDACGLLQ  |
| TlZTL  | NKMCLTPIHGADGVIITHIIGIQSFMEAKLDLGPLPCPSWKDSRSDSCGLLH  |
|        |                                                       |
| KfZTL  | LSDEVLSRIILGRLAPKDVAICSMVCRRFRRLGQDDYIWKRVCRNSWGHN    |
| AtFKF1 | LSDEVLAHNILSRLTPRDVASIGSACRRLRQLTKNESVRKMVCQNAWGKE    |
| OsFKF1 | LSDEVLAHNILSRLSPRDVASIGSVCTRMHELTKNHDLRKMVCQNAWGRD    |
| AaZTL  | LSNEVLSYRILALVSPRDVASIGLVCRRRLHQLTKNDDLWKLVCQNAWGAD   |
| AtLKP2 | LSDEVIAIKILSQLTPGDIASVGCVCRRRLNELTKNDDVWRMVCQNTWGTE   |
| SmZTL  | LSDEVLVQKILAQLTPRDVSSVALVCRRFNEMTKNTDLWRLVCRNAWGLE    |
| OsZTL1 | LSDEVLCQKILSRLSPRDIASVNSVCKRRLYHLTRNDDLWRMVCQNAWGSE   |
| OsZTL2 | LTDEVLCQSILSRLSPRDIASVSSVCRRLYLLTRNEDLWRMVCQNAWGSE    |
| PaZTL  | LSDEVLAQKILSRLTPRDVASVGSVCKRRLYQLTKNEDLWRMVCQNAWGSE   |
| AtZTL  | LSDEVVSMKILSRLTPRDVASVSSVCRRLYVLTKNEDLWRRVCQNAWGSE    |
| MpFKF1 | LSDEVLTHKIIAYVAPRDVAALGLVCRRRLHEITKNNDLWRSVCQNSWGFE   |

|        |                                                      |
|--------|------------------------------------------------------|
| TlZTL  | LSDEVLAQKILALVAPRDVAAIGSVCKRLHELTKNEDLWRMVCQNAWGSE   |
| KfZTL  | TAAAIQAALDTPSLGWARIARELTTLEAAAWRKFTVGGSVEPSRCNFSAC   |
| AtFKF1 | ITGTLEIM--TKKLRWGRLARELTTLEAVCWRKFTVGGIVQPSRCNFSAC   |
| OsFKF1 | VTVRLEMS--TKMLGWGRLARELTTLEAASWRKFTVGGRVEPSRCNFSAC   |
| AaZTL  | ATMSLQALPGTTSVAWGRLARELTSLEAVAWRKLTVGGAVEPSRCNFSAC   |
| AtLKP2 | ATRVLESVPGAKRIGWVRLAREFTTHEATAWRKFSVGGTVEPSRCNFSAC   |
| SmZTL  | TTAVLERVHNPRSIDWGMLARELTTLEAAAWRKLKVGGAVEPSRCNFSAC   |
| OsZTL1 | ATQVLETVAGTRSLAWGRLARELTTLEAVTWRKLTVGGAVEPSRCNFSAC   |
| OsZTL2 | TTRALETVPAAKRLGWGRLARELTTLEAVAWRKLTVGGAVEPSRCNFSAC   |
| PaZTL  | TTRVLETVPGAKRLGWGRLARELTTLEAAAWRKLTVGGAVEPSRCNFSAC   |
| AtZTL  | TTRVLETVPGAKRLGWGRLARELTTLEAAAWRKLTVGGAVEPSRCNFSAC   |
| MpFKF1 | ATKALESVPGADNLEWGRLARELTTLEAAAWRKLTVGGAVEPSRCNFSAC   |
| TlZTL  | ATAMLEAVPPAGRIGWGQLARELTTLEAAAWKKLTVGGGVEPSRCNFSAC   |
| KfZTL  | AVGNKLVLFGGEGVNMQPMNDTFVLDSLLEHPAWRHVDVSAAPPGRWGHT   |
| AtFKF1 | AVGNRLVLFGGEGVNMQPLDDTFVLNLDACPEWQRVVRTSSPPGRWGHT    |
| OsFKF1 | AVGNRLVLFGGEGVNMQPMDDTFVLNLESAPKEWRRVKVSASPPGRWGHT   |
| AaZTL  | AVGNKLVLFGGEGANMQPMNDTFVLDFSVPHPEWIRIEVGSPPPGRWGHT   |
| AtLKP2 | AVGNRIVIFGGEGVNMQPMNDTFVLDLGSSSPEWKSVLVSSPPPGRWGHT   |
| SmZTL  | AVGNKVVLFGGEGVNMQPMNDTFVLDSLAAACPEWRHVDVGSAPPGRWGHT  |
| OsZTL1 | AAGNRVVLFGGEGVNMQPMNDTFVLDLNASKPEWRHINRSAPPGRWGHT    |
| OsZTL2 | AVGNRVVLFGGEGVNMQPMNDTFVLDLNASNPEWRHVNVSSAPPGRWGHT   |
| PaZTL  | AVGNRLVLFGGEGVNMQPMNDTFVLDSLAAANPEWRHVNVSSPPPGRWGHT  |
| AtZTL  | AVGNRVVLFGGEGVNMQPMNDTFVLDLNSDYPEWQHVKVSSPPPGRWGHT   |
| MpFKF1 | AVGNKLVLFGGEGVNMQPMNDTFVLDSLKVHPAWQHVNKSSPPPGRWGHT   |
| TlZTL  | AVGNKLVLFGGEGVNMQPMNDTFVLDSLVAKPEWRHVHVSSPPPGRWGHT   |
| KfZTL  | LCCLNGSWLVVFGGCGTDGPLNDVFLDLDAEHPAWREVAGAGPPLPRSW    |
| AtFKF1 | LSCLNGSWLVVFGGCGRQGLLNDVFLDLDAKHPTWKEVAGTTPPLPRSW    |
| OsFKF1 | LSWLNGSWLVVFGGCGQQGLLNDVFLDLDAKQPTWREVASEGPPLPRSW    |
| AaZTL  | LSCVNGSWLVVFGGCGKDGLLNDVYVVDLDEPHPTWRKVAGAVPPVPRSW   |
| AtLKP2 | LSCVNGSRLVVFGGYGSHGLLNDVFLDLADPPSWREVSGLAPPIPRSW     |
| SmZTL  | LSCLNGSWLVVFGGCGRQGLLNDVFLDLDAKQPSWREVAGVGPVPRSW     |
| OsZTL1 | LSCLNGSRLVLFGGCGRQGLLNDVFMLDLDAQOPTWREIPGLAPPVPRSW   |
| OsZTL2 | LSCLNGSLLVVFGGCGRQGLLNDVFTLDLDAKQOPTWREIPGVAPPVPRSW  |
| PaZTL  | LSCLNGSWLVVFGGCGRQGLLNDVFI LDLDAQOPTWREVAGSAPPLPRSW  |
| AtZTL  | LTCVNGSNLVVFGGCGQQGLLNDVFLNLDKAPPTWREISGLAPPLPRSW    |
| MpFKF1 | LSCLNKSWLVVFGGCGRDGLLNDVFI VDLDAKQPIWREIGGAVAPIPRSW  |
| TlZTL  | LSCLNDSWLVVFGGCGRDGLLNDVFTLDLDAEQPTWCEVAGAAPPLPRSW   |
| KfZTL  | HSSCTVDGTYLVVFGGCTDTGRLLSDTFLLDLTAQKPVWREIVGGFKPPS   |
| AtFKF1 | HSSCTIEGSKLVVSGGCTDAGVLLSDTFLLDLTTDKPTWKEIPTSWAPPS   |
| OsFKF1 | HSSCTLDGSKLVVSGGCTESGVLLSDTFLLDLTKEKPAWKEIPTSWSPPS   |
| AaZTL  | HSSCTLDGTKLVVSGGSADSG--LLSDTFILDVAKEEPIWQEI PVSWSPPA |
| AtLKP2 | HSSCTLDGTKLIVSGGCADSGALLSDTFLLDLSMDIPAWREIPVPTWPPS   |
| SmZTL  | HSSCTLDGTQLVVYGGCADSGVLLSDTYMLDISKEKPMWREIPVAWTPPS   |

|        |                                                        |
|--------|--------------------------------------------------------|
| OsZTL1 | HSSCTLDGTKLVVSGGCADSGVLLSDTYLLDVTMERPVWREIPASWTPPC     |
| OsZTL2 | HSSCTLDGTKLVVSGGCADSGVLLSDTYLLDVTMDKPVWREVPASWTPPS     |
| PaZTL  | HSSCTLDGTKLVVSGGCADSGVLLSDTFLLDLTMEKPIWKEIPVSWTPPS     |
| AtZTL  | HSSCTLDGTKLIVSGGCADSGVLLSDTFLLDLSIEKPVWREIPAAWTPPS     |
| MpFKF1 | HSSCTLDGTKLVVSGGCADSGVLLSDTFLLDLTMEKPMWREIHVSWSPPS     |
| TlZTL  | HSSCTVDATKLVVSGGCADSGVLLSDIFLLDLTMKKPKWREFPVSWSPPS     |
|        |                                                        |
| KfZTL  | RLGHSLSVLEGSKVL MFGGLAQSGPLRLRSSDVFTIDVGIQEPNWNLYLTG   |
| AtFKF1 | RLGHSLSVFGRTKILMFGGLANSGLKLRSGEAYTIDLEDEEPRWRELEC      |
| OsFKF1 | RLGHTLSVFGKTKLFMFGGLAKSGSLRRLRSCDAYTMDAGEDSPQWRQLAT    |
| AaZTL  | RLGHTLTVYGDKKILMFGGLAKSGPLSLRSSDVFTIDLSEEEPKWKYVTG     |
| AtLKP2 | RLGHTLTVYGDRKILMFGGLAKNGTLRFRSNDVYTMDLSEDEPSWRPVIG     |
| SmZTL  | RLGHSLSAYGGRKILLFGGLAKSGPLRFRSSDAFTIDLGEEEEPTWKYVTG    |
| OsZTL1 | RLGHSLSVYDGRKILMFGGLAKSGPLRLRSNDVFTLDLSENKPCWRCITG     |
| OsZTL2 | RLGHSM SVYGGRKILMFGGLAKSGPLRLRSSDVFTMDLSEEEPCWRCLTG    |
| PaZTL  | RLGHSLTVYGGRKILMFGGLAKSGPLRLRSSDVYTIDLSEEEPKWRYLTG     |
| AtZTL  | RLGHTLSVYGGRKILMFGGLAKSGPLKFRSSDVFTMDLSEEEPCWRCVTG     |
| MpFKF1 | RLGHTLCVYQGKVL MFGGLAKSGPLRLRSSDVFTIDLSEEQPKWKYVTG     |
| TlZTL  | RLGHTLSVYGGCKILMFGGLAKSGPLRLRSSDVFTIDLSEDPKWKYVTG      |
|        |                                                        |
| KfZTL  | SMLPGGAPATGPSPPRLDHVAATLPGGRVLI FGGSVAGQHSP IQLYVLD    |
| AtFKF1 | SAFPG-----VVVPPRLDHVAVSMPCGRV IIFGGSIAGLHSPSQFLID      |
| OsFKF1 | TGFP-----SIGPPRLDHVAVSLPCGRI IIFGGSIAGLHSPSQFLLD       |
| AaZTL  | SSLPGGATPADTPPPRLDHVAVSLTGGRVLI FGGSIAGLHSASQLYLLD     |
| AtLKP2 | YGSSLP M----AAPPRLDHVAISLPGGRILIFGGSVAGLDSASQLYLLD     |
| SmZTL  | STLPGGANIGGTPPPRLDHVAVTLPGGRILIFGGSIAGLHSASQIYLLD      |
| OsZTL1 | SGMPGASNPAVGPPPPRLDHVAVSLPGGRILIFGGSVAGLHSASKLYLLD     |
| OsZTL2 | SGMPGAGNPAGAGPPPPRLDHVAVSLPGGRVLI FGGSVAGLHSASQLYLLD   |
| PaZTL  | SGMPGAGNPGGKAPPRLDHVAVSLPGGRVLI FGGSVAGLHSASQLYLLD     |
| AtZTL  | SGMPGAGNPGGVAPPRLDHVAVNLPGRILIFGGSVAGLHSASQLYLLD       |
| MpFKF1 | STLPGGAAPAGTPPPRLDHVAVSLPGGRILIFGGSIAGLHSPAQLFVLD      |
| TlZTL  | STLPGGATPAGTPPPRLDHVAVSLPGGRVLI FGGSIAGLHSASQLYLLD     |
|        |                                                        |
| KfZTL  | PKEGRPSWRMLNAPGLLPQYAWGHSTCVVGGTRAVVLGGFEGEERLLNEL     |
| AtFKF1 | PAEEKPSWRILNVP GKPPKLA WGHSTCVVGGTRVLVLGGHTGEEWILNEL   |
| OsFKF1 | PAEEKPTWRILNVP GQPPKFA WGHSTCVVGGTRVLVLGGHTGEEWILNEL   |
| AaZTL  | PAEEKPTWRMLDVP GDQPKFA WGHSTCVVGGIRAVVMGGHTGEEWILNEL   |
| AtLKP2 | PNEEKPAWRILNVQGGPPRFA WGHSTCVVGGTRLVVLGGQTGEEWMLNEA    |
| SmZTL  | PSEEEKPTWRMLNVP GQKPKFA WGHSTCFVGGTRAVVLGGHTGEDWILNEL  |
| OsZTL1 | PTEEEKPTWRILNVP GRPPRFA WGHSTCVVGGTKAIVLGGQTGEEWTLTEL  |
| OsZTL2 | PTEEEKPTWRILNVP GRPPRFA WGHSTCVVGGTKAIVLGGQTGEEWMLTEI  |
| PaZTL  | PTEEEKPTWRILNVP GQQPRFA WGHSTCVVGGTRALVVLGGHPGEEWILNEL |
| AtZTL  | PTEDKPTWRILNIP GRPPRFA WGHGTCVVGGTRAIVLGGQTGEEWMLSEL   |
| MpFKF1 | PKEEQSTWRVLNVP GQPPKFA WGHSTCVVGGTRAVVLGGHTGEEWILNEL   |
| TlZTL  | PIEEKPTWRMLNVP GQQPKFA WGHSTCVVGGTRAVVLGGHTGEEWILNEL   |
|        |                                                        |
| KfZTL  | HELSLLDVP                                              |

|        |            |
|--------|------------|
| AtFKF1 | HELCLASRQ  |
| OsFKF1 | HELCLASRP  |
| AaZTL  | HELSLASKM  |
| AtLKP2 | HELLLATST  |
| SmZTL  | HELSSLSTS  |
| OsZTL1 | HELSLMFPT  |
| OsZTL2 | HELSSLASST |
| PaZTL  | HELSLASKH  |
| AtZTL  | HELSLASYL  |
| MpFKF1 | HELSITHKS  |
| TlZTL  | HELSLASKV  |

;  
end;



**Fig. S2** Inferred phylogeny of homologs to the ELF3 gene family. The tree was constructed using MrBayes and PhyML on an amino acid alignment of proteins retrieved from *Arabidopsis thaliana* (At), *Oryza sativa* (Os), *Picea abies* (Pa), *Selaginella moellendorffii* (Sm), *Physcomitrella patens* (Pp), *Marchantia polymorpha* (Mp), *Anthoceros agrestis* (Aa), and *Klebsormidium flaccidum* (Kf). The Bayesian tree is shown with posterior probabilities (above) and bootstrap proportions from PhyML analysis (below) for each node. Nodes with conflicting support from the two methods were collapsed. Branch length is relative to the thickness of individual branches: the shortest branches have a straight line and the longest are increasingly triangular.

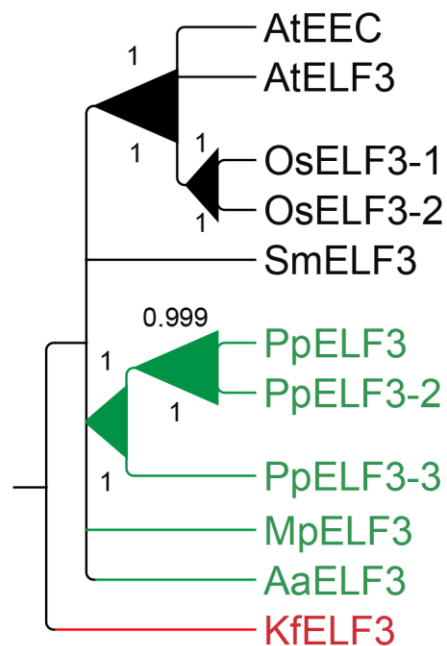

**Fig. S3** Inferred phylogeny of homologs to the ELF4 gene family. The tree was constructed using MrBayes and PhyML on an amino acid alignment of proteins retrieved from *Arabidopsis thaliana* (At), *Oryza sativa* (Os), *Picea abies* (Pa), *Selaginella moellendorffii* (Sm), *Physcomitrella patens* (Pp), *Marchantia polymorpha* (Mp), *Anthoceros agrestis* (Aa), and *Klebsormidium flaccidum* (Kf). The Bayesian tree is shown with posterior probabilities (above) and bootstrap proportions from PhyML analysis (below) for each node. Nodes with conflicting support from the two methods were collapsed. Branch length is relative to the thickness of individual branches: the shortest branches have a straight line and the longest are increasingly triangular.

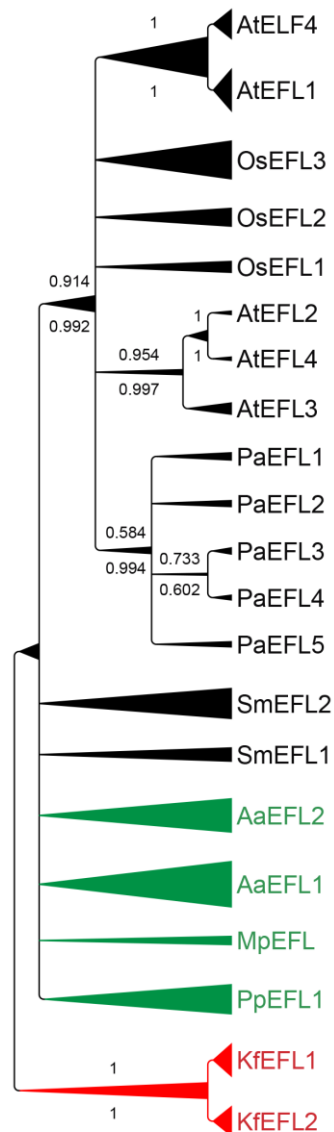

**Fig. S4** Inferred phylogeny of homologs to the LUX gene family. The tree was constructed using MrBayes and PhyML on an amino acid alignment of proteins retrieved from *Arabidopsis thaliana* (At), *Oryza sativa* (Os), *Picea abies* (Pa), *Selaginella moellendorffii* (Sm), *Physcomitrella patens* (Pp), *Marchantia polymorpha* (Mp), *Anthoceros agrestis* (Aa), and *Klebsormidium flaccidum* (Kf). The Bayesian tree is shown with posterior probabilities (above) and bootstrap proportions from PhyML analysis (below) for each node. Nodes with conflicting support from the two methods were collapsed. Branch length is relative to the thickness of individual branches: the shortest branches have a straight line and the longest are increasingly triangular. The SHAQKYF-like motif in LUX homologs is SHLQKYR.

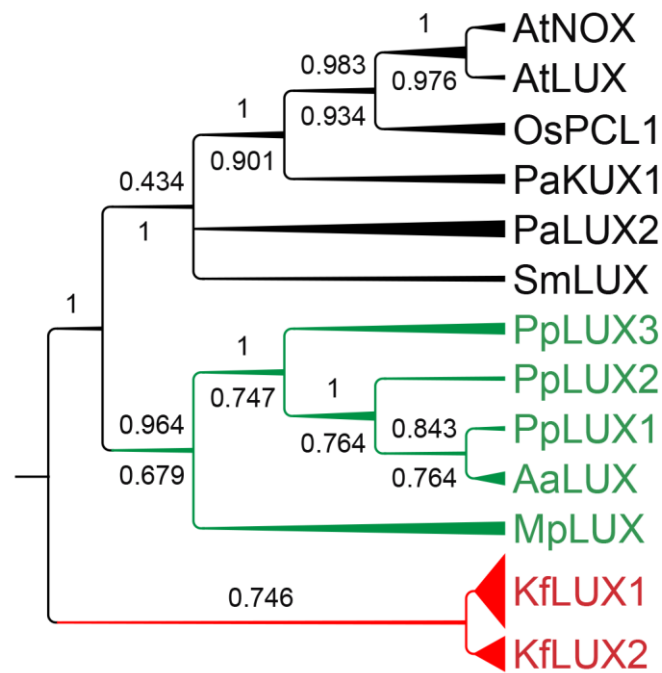

**Fig. S5** Inferred phylogeny of homologs to the Gl gene family. The tree was constructed using MrBayes and PhyML on an amino acid alignment of proteins retrieved from *Arabidopsis thaliana* (At), *Oryza sativa* (Os), *Picea abies* (Pa), *Selaginella moellendorffii* (Sm), *Marchantia polymorpha* (Mp), *Anthoceros agrestis* (Aa), *Cylindrocystis cushleckae* (Cc), *Coleochaete irregularis* (Ci) and *Takakia lepidozooides* (Tl). The Bayesian tree is shown with posterior probabilities (above) and bootstrap proportions from PhyML analysis (below) for each node. Nodes with conflicting support from the two methods were collapsed. Branch length is relative to the thickness of individual branches: the shortest branches have a straight line and the longest are increasingly triangular. † indicates gene loss in Pp (as well as all other mosses except Takakia).

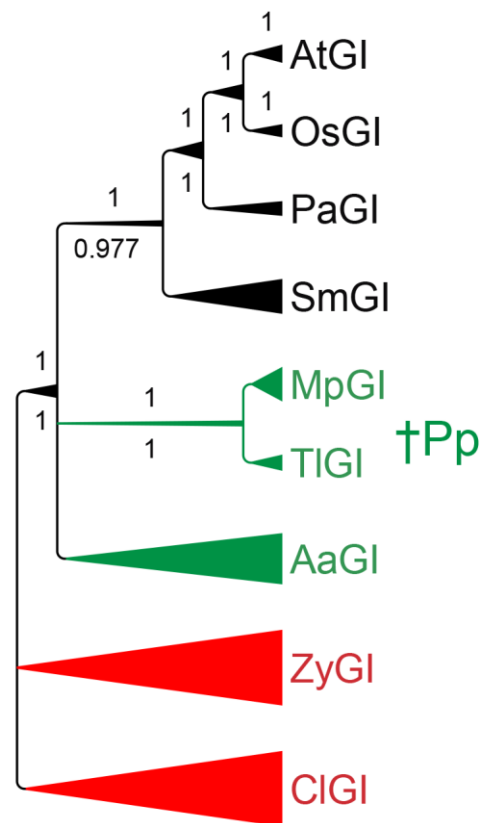

**Fig. S6** Inferred phylogeny of homologs to the ZTL gene family. The tree was constructed using MrBayes on an amino acid alignment of proteins retrieved from *Arabidopsis thaliana* (At), *Oryza sativa* (Os), *Picea abies* (Pa), *Selaginella moellendorffii* (Sm), *Takakia lepidozoides* (Ti), *Marchantia polymorpha* (Mp), *Anthoceros agrestis* (Aa), and *Klebsormidium flaccidum* (Kf). The Bayesian tree is shown with posterior probabilities (above) and bootstrap proportions from PhyML analysis (below) for each node. Nodes with conflicting support from the two methods were collapsed. Branch length is relative to the thickness of individual branches: the shortest branches have a straight line and the longest are increasingly triangular. † indicates gene loss in *Physcomitrella patens* (Pp; as well as all other mosses except Takakia).

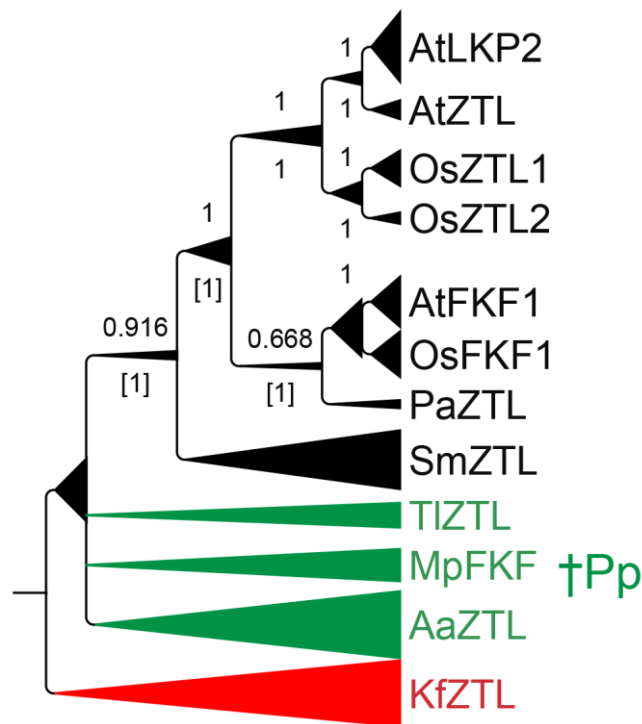

**Fig. S7** Temporal expression patterns of putative circadian clock genes in *M. polymorpha* (Mp) under ND, LL, and DD conditions. Plants were sampled every fourth hour during 2 d. Quantitative RT-PCR expression values with standard errors are based on two biological replicates and were normalized using three reference genes (see the Materials and Methods section for details).

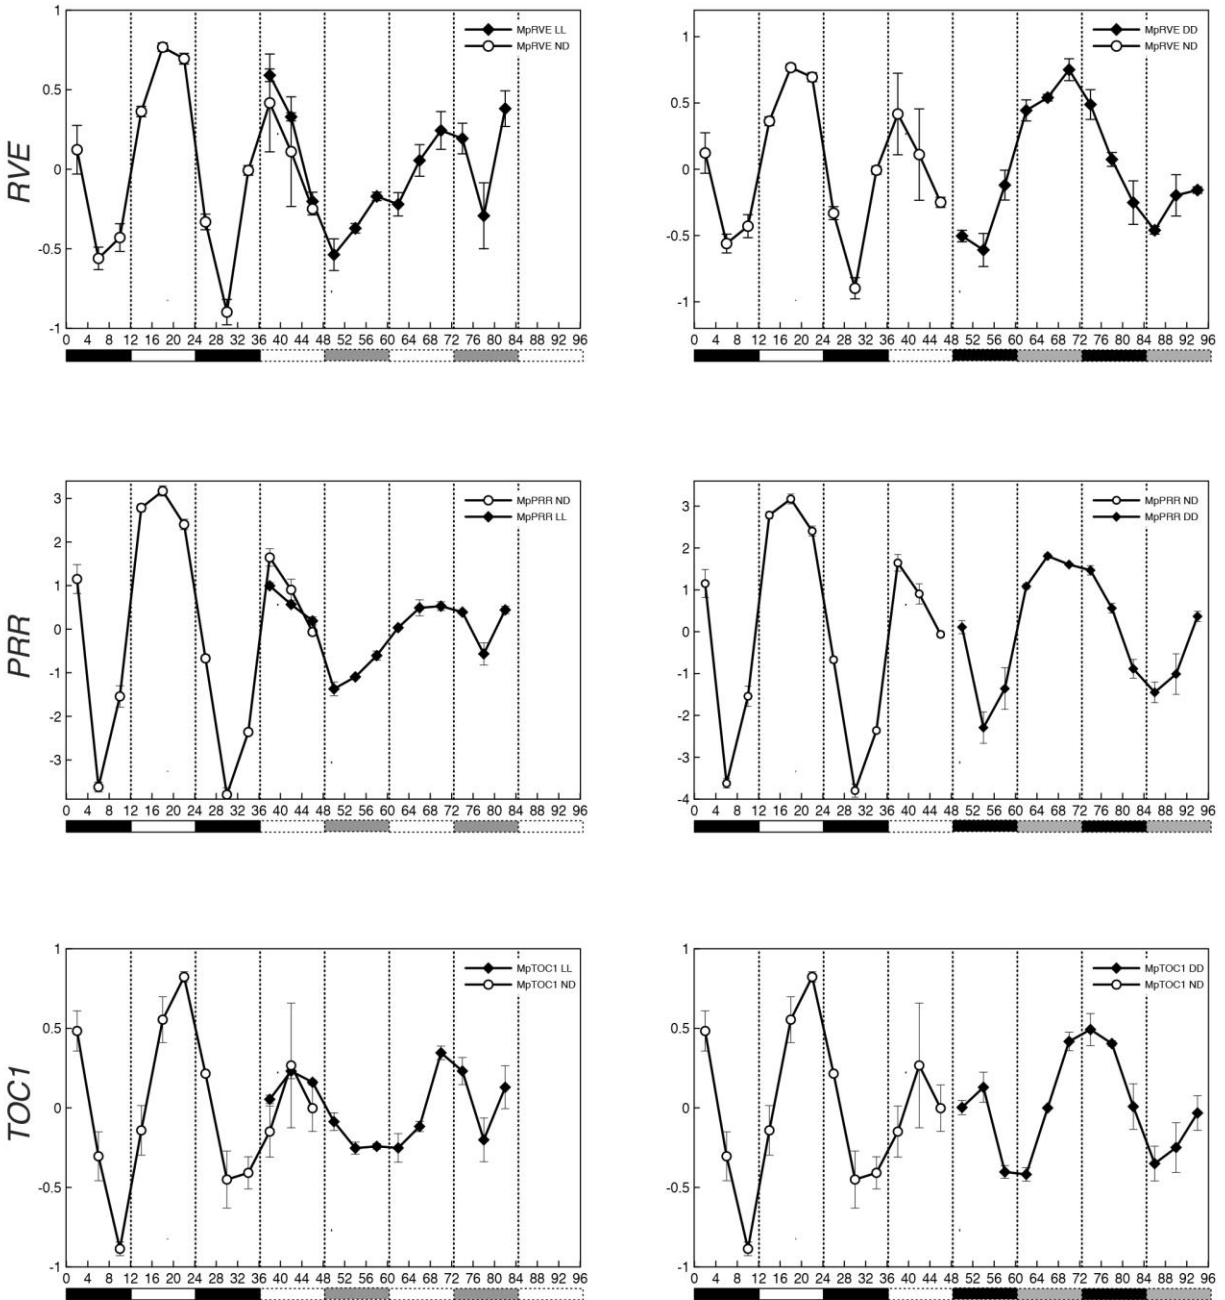

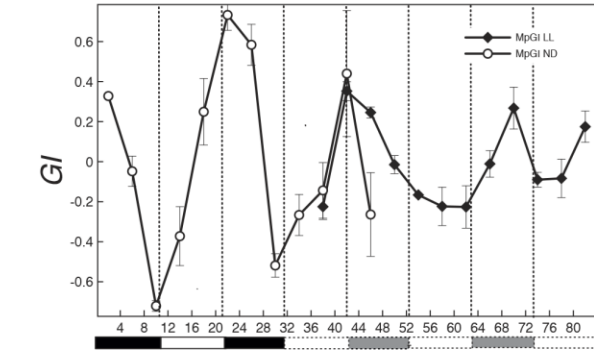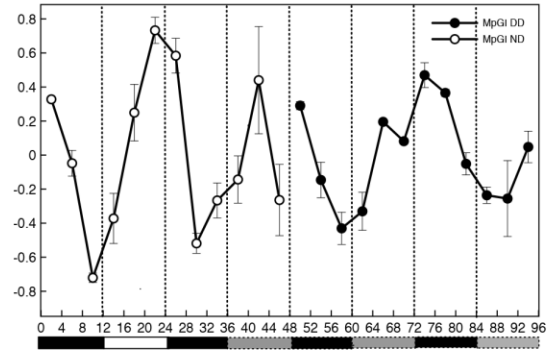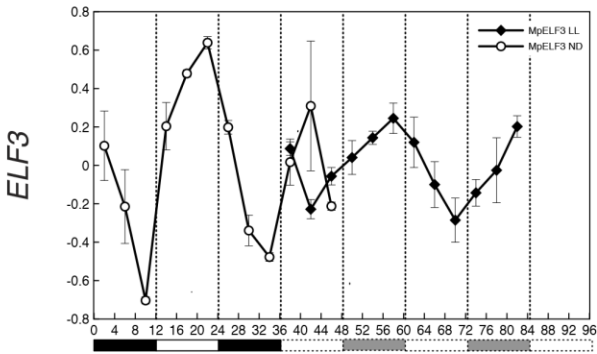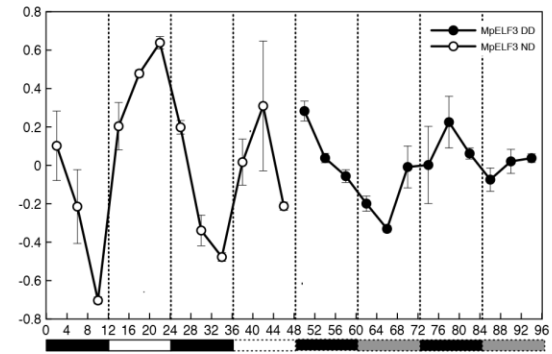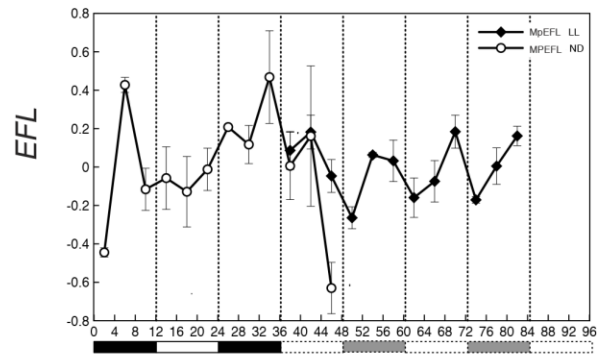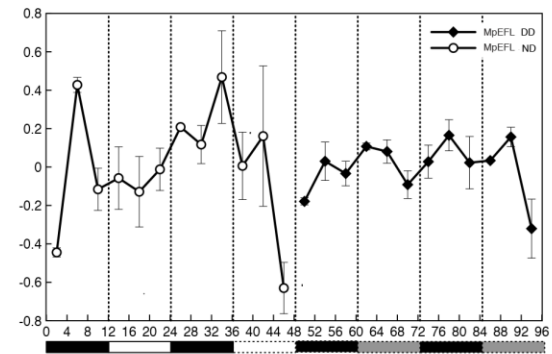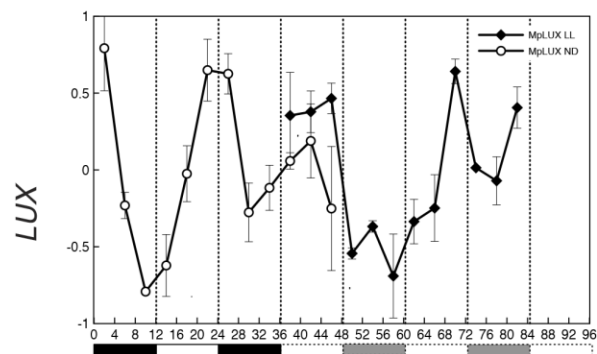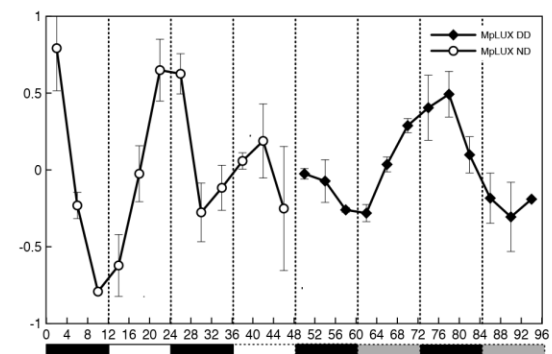

**Fig. S8** Generation of *MpRVE* knockout mutant. The exon-intron structure of *MpRVE* and the construct used for *MpRVE* transformation are shown in (a). Primer sets used in (b) are illustrated as arrows with numbers. The result of genomic PCR of *MpRVE* knock-out line and WT are shown in (b). Numbers refer to primer sets as shown in (a).

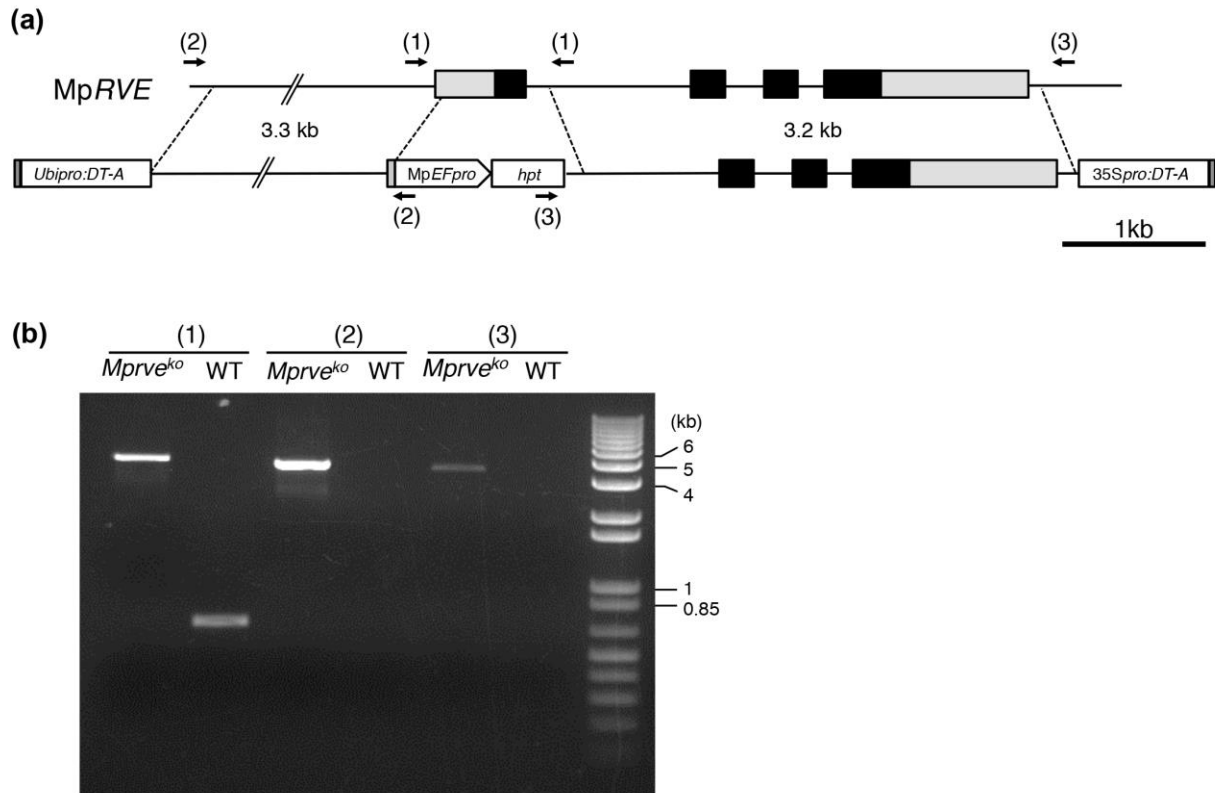



**Fig. S9** Generation of MpPRR knockout mutant. The exon-intron structure of MpPRR and the construct used for MpPRR transformation are shown in (a). Primer sets used in (b) are illustrated as arrows with numbers. The result of genomic PCR of MpPRR knock-out line and WT are shown in (b). Numbers refer to primer sets as shown in (a).

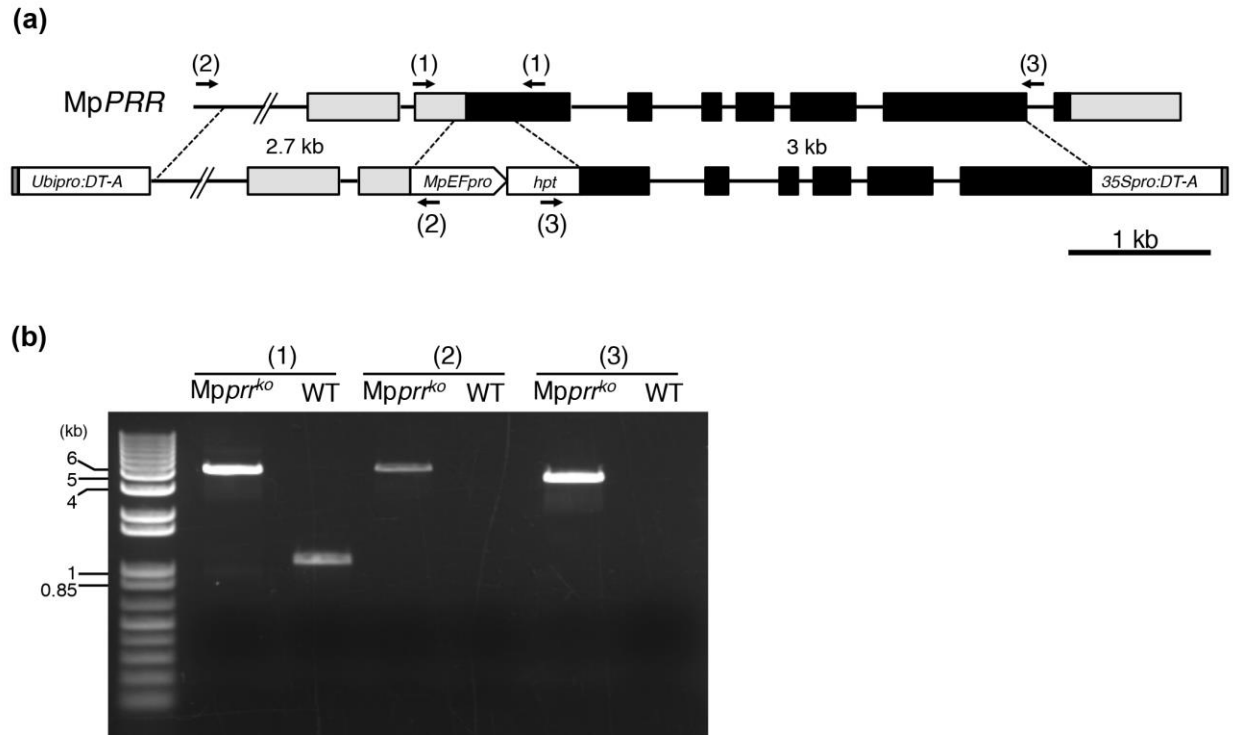

**Fig. S10** Generation of *MpTOC1* knockout mutants. The exon-intron structure of *MpTOC1* and the construct used for *MpTOC1* transformation are shown in (a). Primer sets used in (b) are illustrated as arrows with numbers. The result of genomic PCR of three *MpTOC1* knock-out lines and WT are shown in (b). Numbers refer to primer sets as shown in (a).

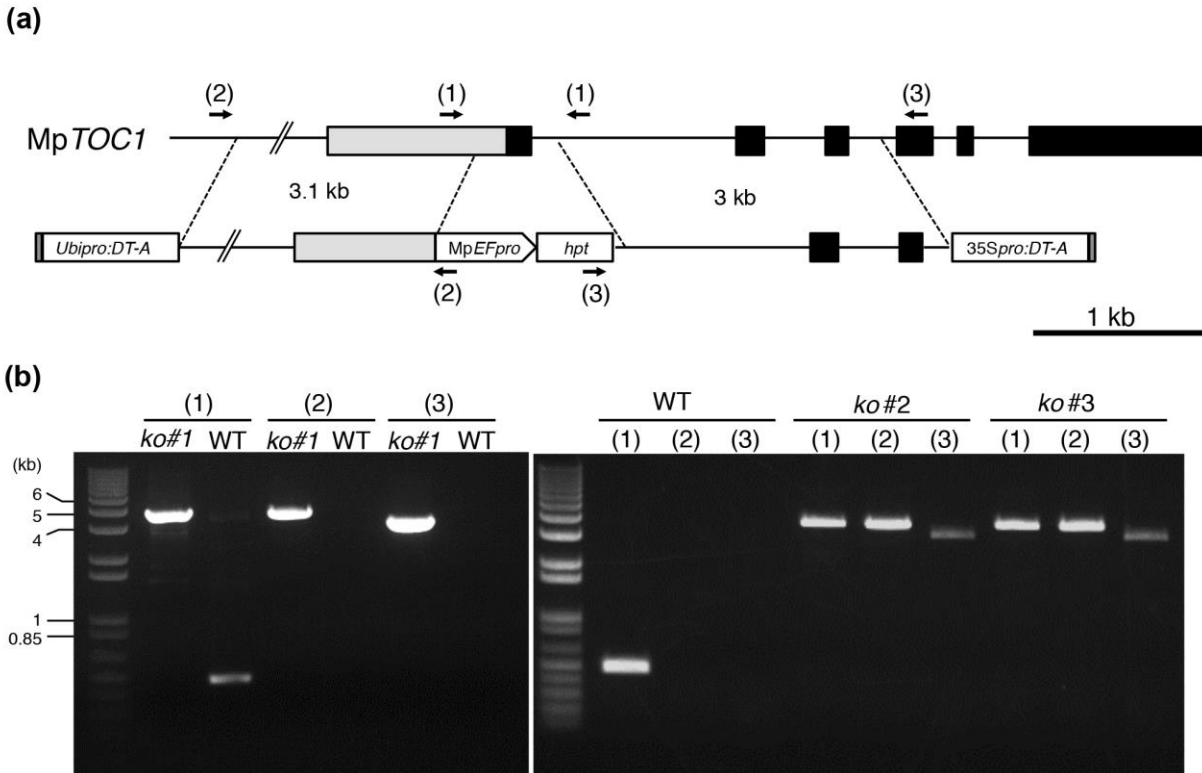

**Fig. S11** Temporal expression pattern of *MpPRR* (a) and *35S:LUC* (b) under ND and LL conditions. Quantitative RT-PCR expression values with standard errors are based on 3 biological replicates and were normalized using *MpEF1*.

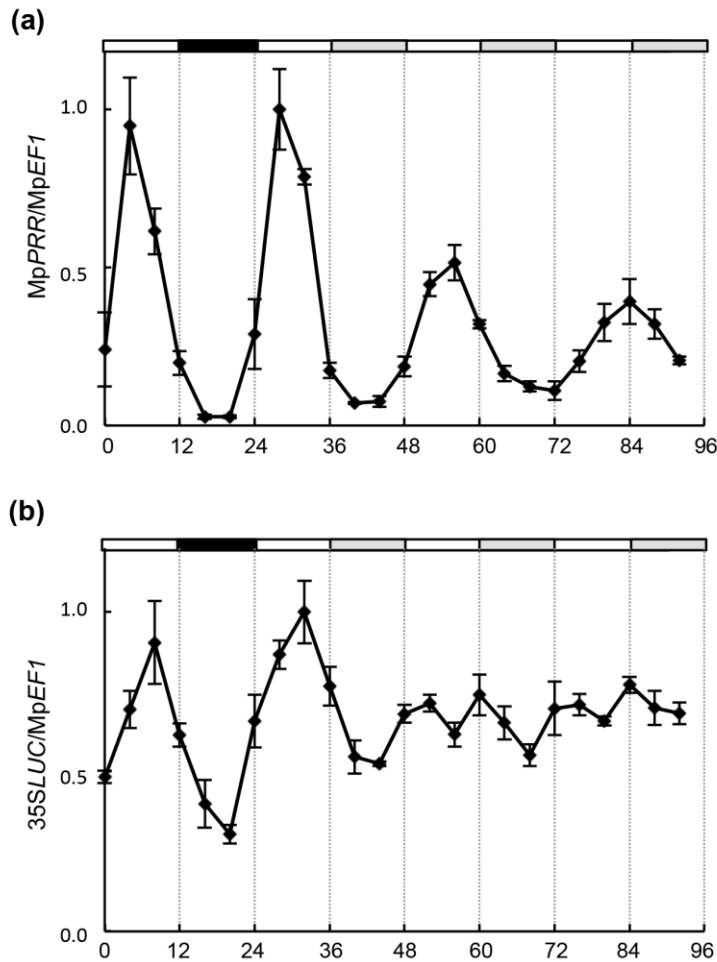

**Fig. S12** Temporal expression pattern of *MpPRR* in WT, *Mprve<sup>ko</sup>*, *Mptoc1<sup>ko</sup>* and restored lines of *Mprve<sup>ko</sup>*. *MpPRR* expression in WT, *Mprve<sup>ko</sup>* and a restored line are shown in (a). *MpPRR* expression under ND conditions (b) and LL conditions (c) in WT and two additional *Mptoc1<sup>ko</sup>* lines. Quantitative RT-PCR expression values with standard errors are based on 3 biological replicates and were normalized using *MpEF1*.

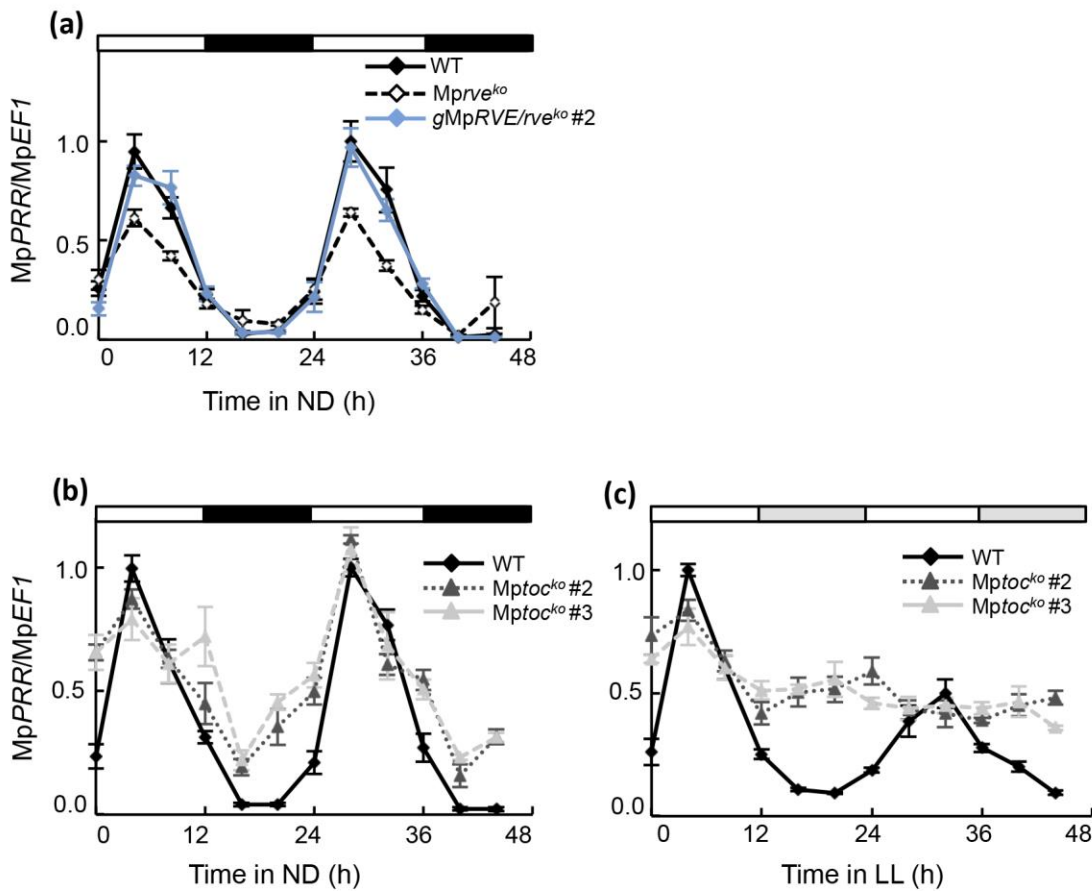

**Fig. S13** *pro:LUC* bioluminescence for MpELF3, MpGI, MpLUX and MpRVE. Plants were entrained in 12 h light, 12 h dark photoperiod and transferred to T=12 photocycles. Light intensity was set to  $5 \mu\text{mol m}^{-2} \text{s}^{-1}$ . Averages from three replicates of one transformant per gene are shown. Expression patterns were readily adjusted to a T=12 photocycle without frequency demultiplication.

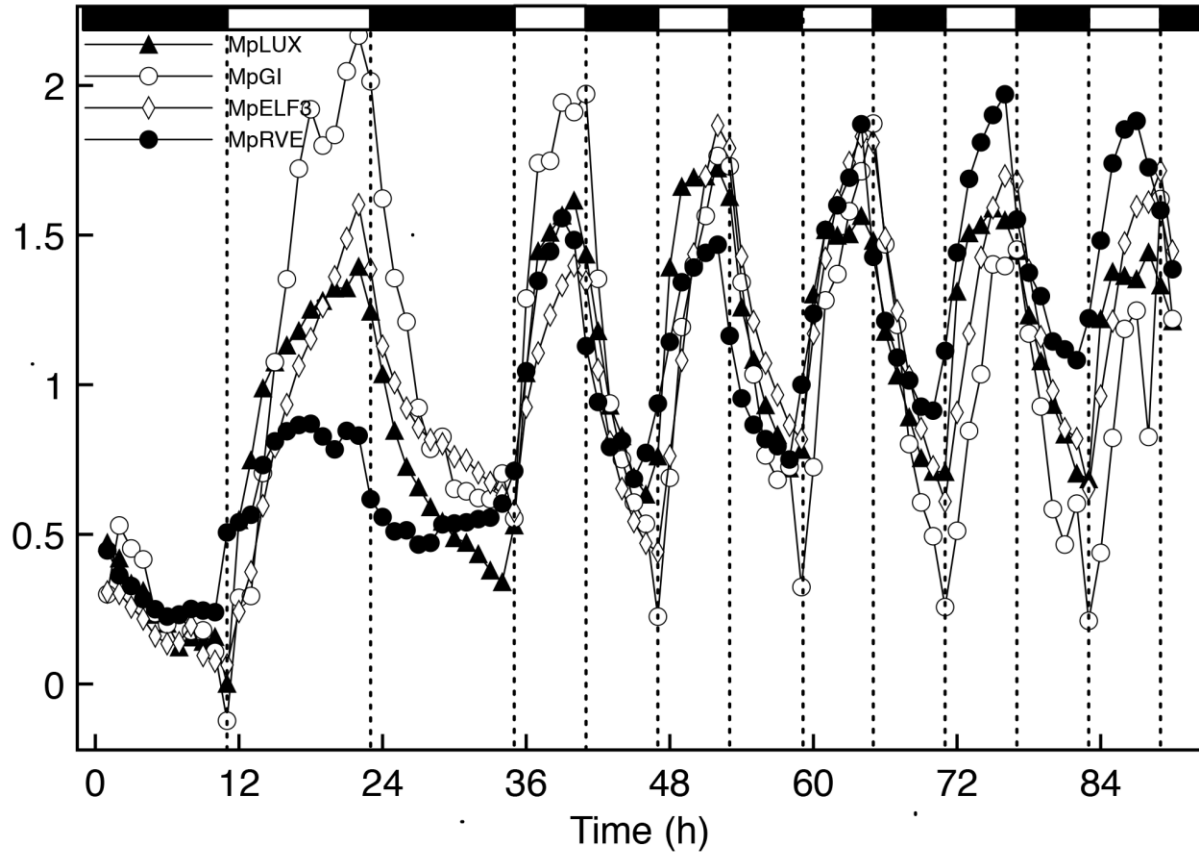

**Fig. S14** Luciferase imaging in transgenic *M. polymorpha* plants expressing luciferase under the control of *M. polymorpha* promoters. (a–c) MpRVE<sub>pro</sub>:LUC. (d–f) MpELF3<sub>pro</sub>:LUC. (g–i) MpGI<sub>pro</sub>:LUC. (j–l) MpLUX<sub>pro</sub>:LUC. (a, d, g, j) 4-d-old gemmaling showing expression at the apical notches. (b, e, h, k) 7-d-old gemmaling with expression at the recently split apical notches. (c, f, j, l) 4-wk-old thallus showing strong expression in apical regions and young gemmae cups. Bioluminescence is pseudocolored in green.

### MpRVE

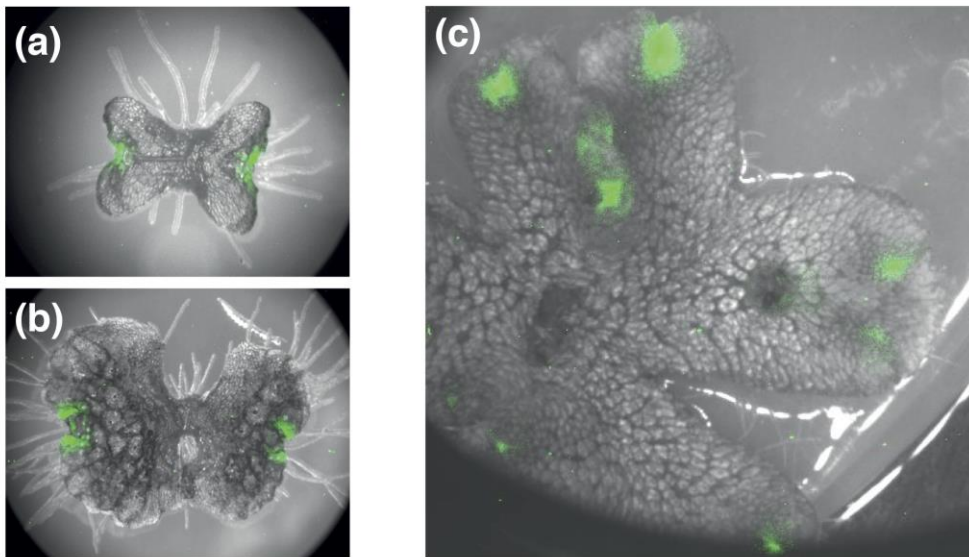

### MpELF3

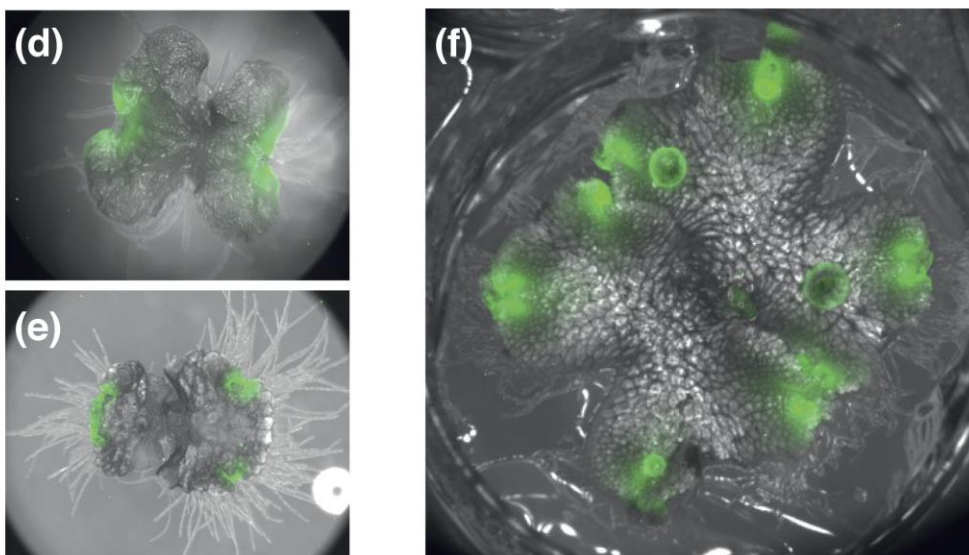

## MpGI

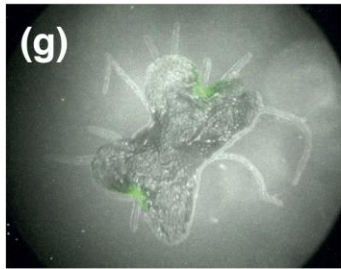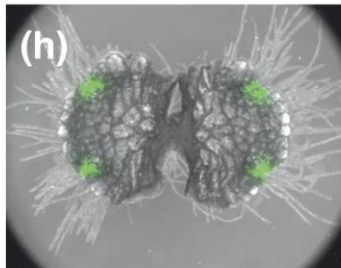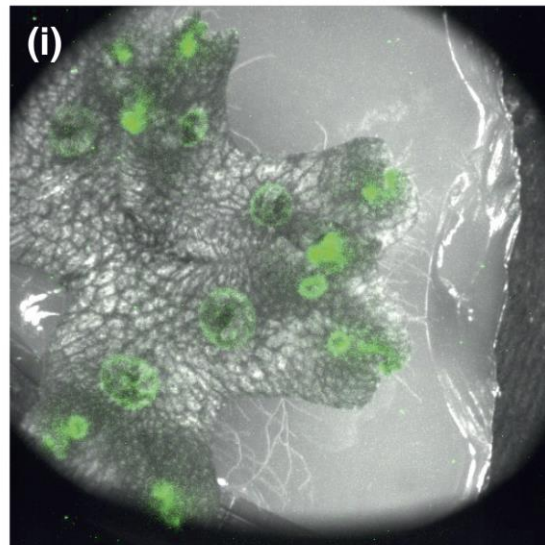

## MpLUX

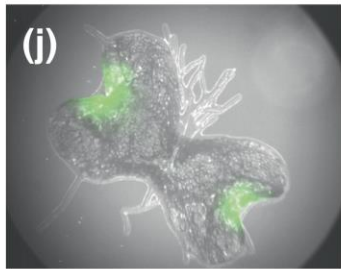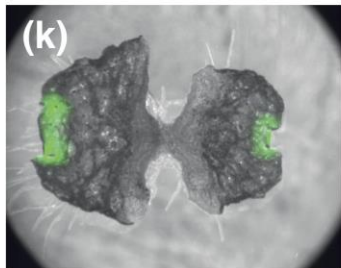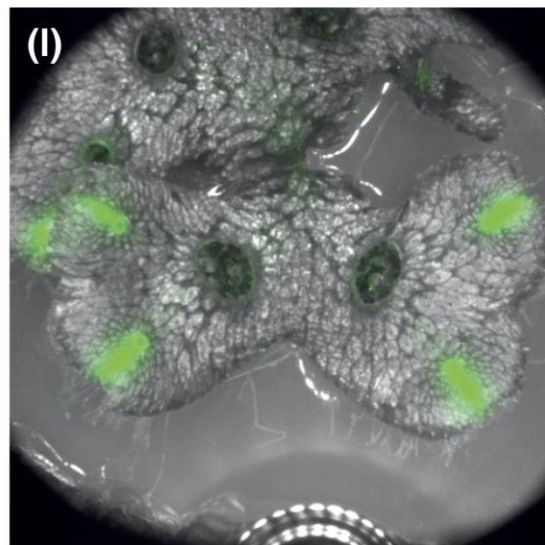

**Fig. S15** *MpPRR<sub>pro</sub>:GUS* expression in mature thallus. *MpPRR<sub>pro</sub>:GUS#7* stained overnight (a, c) or for 4 h (b). Dorsal side (a), and ventral side (b) of mature thallus. Close-up of dorsal side showing air chambers with expression in chlorenchyma cells (c). Arrowheads points at strongly stained meristematic regions.

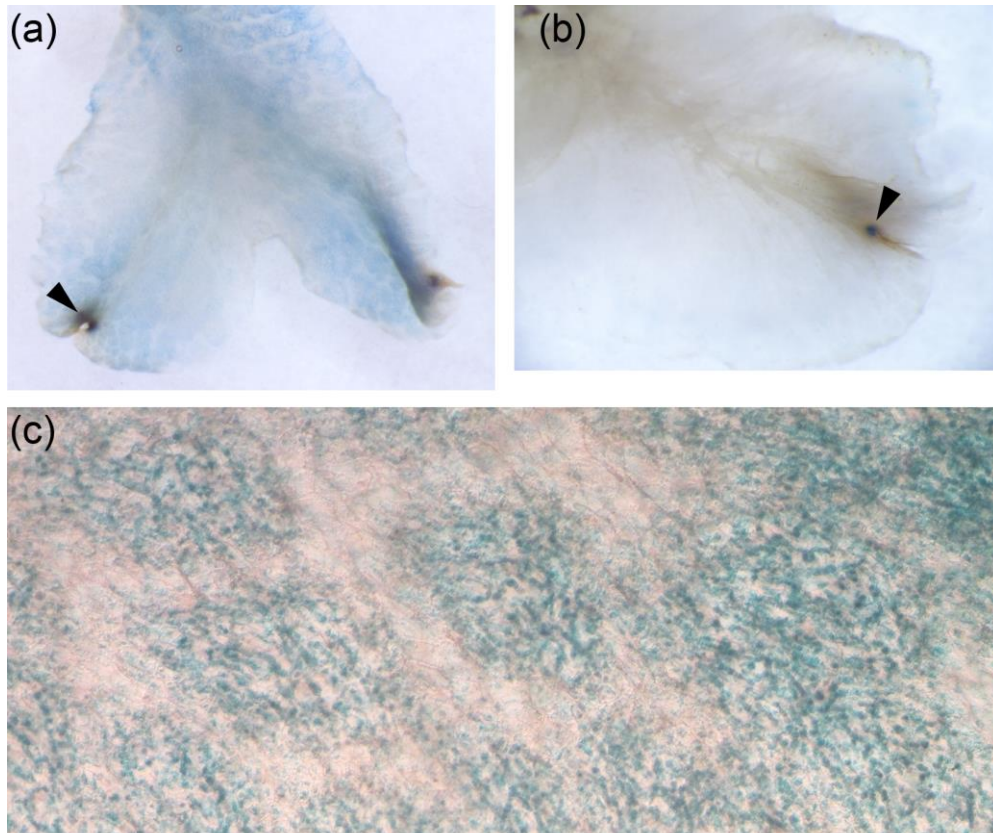



**Fig. S16** Temporal expression patterns of putative circadian clock genes in *A. agrestis* (Aa) under ND, LL, and DD conditions. Plants were sampled every fourth hour during 2 d. Quantitative RT-PCR expression values with standard errors are based on two biological replicates and were normalized using two reference genes (see the Materials and Methods section for details).

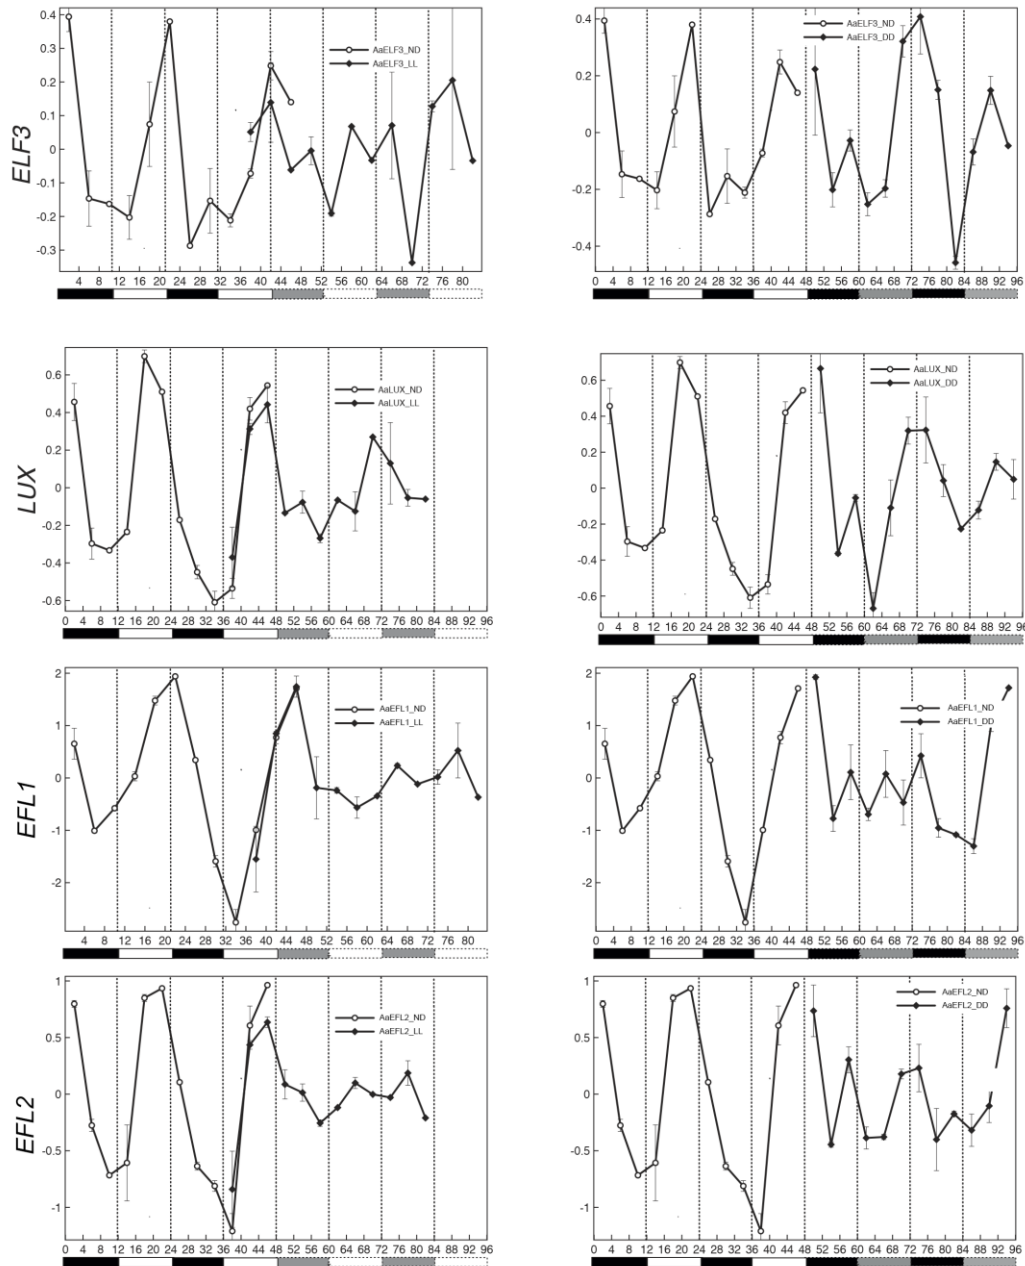

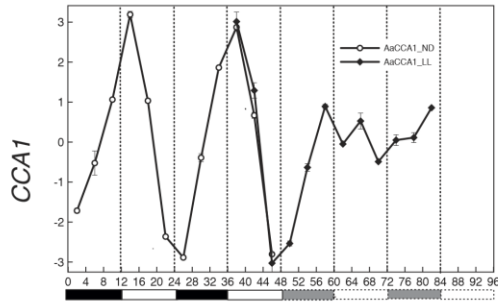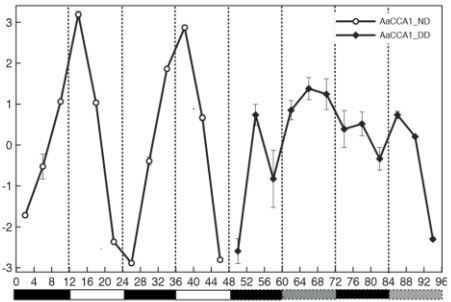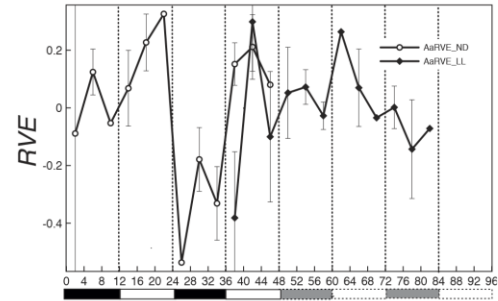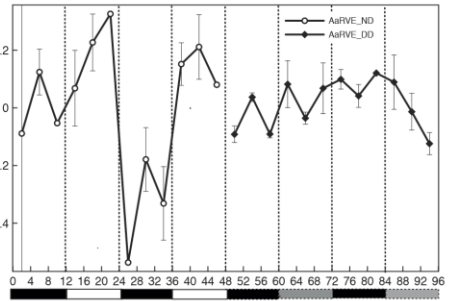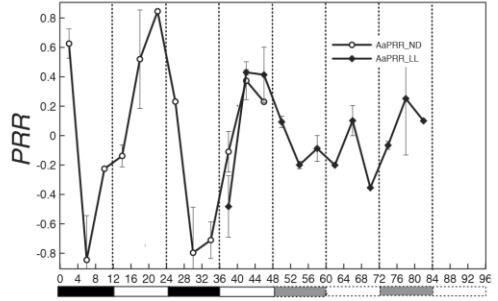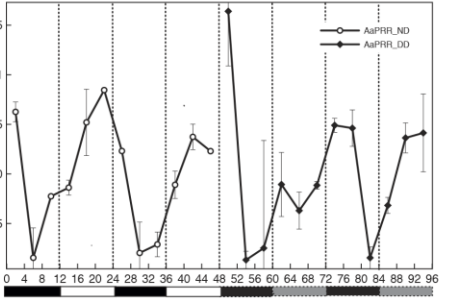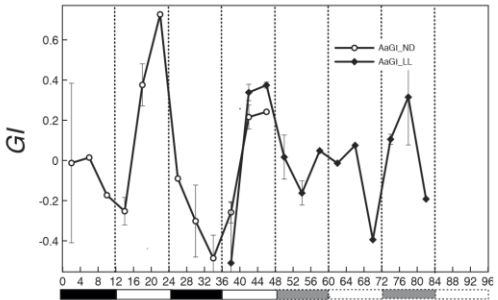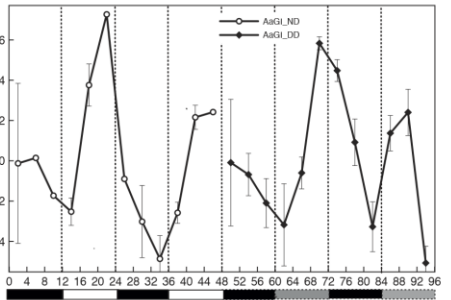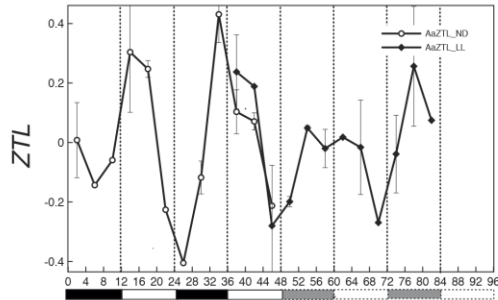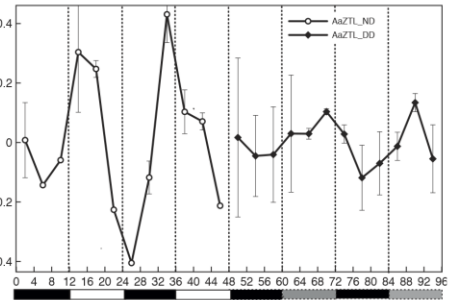

**Table S1** Gene names, family/sub-clade, gene ID or accession number.

| Species                          | Gene name                                                                                                                                                                                                                                  | Gene family/Clade  | ID/Accession      |
|----------------------------------|--------------------------------------------------------------------------------------------------------------------------------------------------------------------------------------------------------------------------------------------|--------------------|-------------------|
| <i>Chlamydomonas reinhardtii</i> | Data from Phytozome v11.0 ( <a href="https://phytozome.jgi.doe.gov">https://phytozome.jgi.doe.gov</a> )                                                                                                                                    |                    |                   |
|                                  | CrLHY (ROC40)                                                                                                                                                                                                                              | RVE                | Cre06.g275350     |
|                                  | CrPRR-1                                                                                                                                                                                                                                    | PRR                | Cre02.g094150     |
|                                  | CrPRR-2                                                                                                                                                                                                                                    | PRR                | Cre16.g676421     |
|                                  | CrLUX-1 (ROC75)                                                                                                                                                                                                                            | LUX <sup>?</sup>   | Cre02.g083750     |
|                                  | CrLUX-2 (ROC15)                                                                                                                                                                                                                            | LUX <sup>?</sup>   | Cre09.g410450     |
|                                  | CrEFL                                                                                                                                                                                                                                      | ELF4 <sup>?</sup>  |                   |
|                                  |                                                                                                                                                                                                                                            |                    |                   |
| <i>Ostreococcus tauri</i>        | Data from JGI ( <a href="http://genome.jgi.doe.gov">http://genome.jgi.doe.gov</a> )                                                                                                                                                        |                    |                   |
|                                  | OtCCA1                                                                                                                                                                                                                                     | RVE                | 4802              |
|                                  | OtTOC1                                                                                                                                                                                                                                     | PRR                | 24394             |
|                                  |                                                                                                                                                                                                                                            |                    |                   |
| <i>Klebsormidium flaccidum</i>   | Data from Klebsormidium flaccidum genome V1.0<br>( <a href="http://www.plantmorphogenesis.bio.titech.ac.jp/~algae_genome_project/klebsormidium/">http://www.plantmorphogenesis.bio.titech.ac.jp/~algae_genome_project/klebsormidium/</a> ) |                    |                   |
|                                  | KfCCA1                                                                                                                                                                                                                                     | RVE/CCA1-LHY-clade | kfl00255_0190     |
|                                  | KfRVE                                                                                                                                                                                                                                      | RVE/LCL clade      | kfl00237_0160     |
|                                  | KfTOC1                                                                                                                                                                                                                                     | PRR/TOC1 clade     | kfl00059_0230     |
|                                  | KfPRR                                                                                                                                                                                                                                      | PRR/PRR clade      | kfl00165_0030     |
|                                  | KfZTL                                                                                                                                                                                                                                      | ZTL                | kfl00059_0220     |
|                                  | KfELF3                                                                                                                                                                                                                                     | ELF3               | kfl00240_0090     |
|                                  | KfEFL-1                                                                                                                                                                                                                                    | ELF4               | kfl00065_0150     |
|                                  | KfEFL-2                                                                                                                                                                                                                                    | ELF4               | kfl00184_0080     |
|                                  | KfLUX-1                                                                                                                                                                                                                                    | LUX                | kfl00118_0040     |
|                                  | KfLUX-2                                                                                                                                                                                                                                    | LUX                | kfl00537_0090     |
|                                  |                                                                                                                                                                                                                                            |                    |                   |
| <i>Anthoceros agrestis</i>       | Data from the oneKP database ( <a href="http://www.onekp.com">www.onekp.com</a> )                                                                                                                                                          |                    |                   |
|                                  | AaCCA1                                                                                                                                                                                                                                     | RVE/CCA1-LHY-clade |                   |
|                                  | AaRVE                                                                                                                                                                                                                                      | RVE/LCL-clade      |                   |
|                                  | AaPRR                                                                                                                                                                                                                                      | PRR/PRR clade      |                   |
|                                  | AaELF3                                                                                                                                                                                                                                     | ELF3               |                   |
|                                  | AaEFL-1                                                                                                                                                                                                                                    | ELF4               |                   |
|                                  | AaEFL-2                                                                                                                                                                                                                                    | ELF4               |                   |
|                                  | AaLUX                                                                                                                                                                                                                                      | LUX                |                   |
|                                  | AaGI                                                                                                                                                                                                                                       | GI                 |                   |
|                                  | AaZTL                                                                                                                                                                                                                                      | ZTL                |                   |
|                                  |                                                                                                                                                                                                                                            |                    |                   |
| <i>Marchantia polymorpha</i>     | Data from Phytozome v11.0 ( <a href="https://phytozome.jgi.doe.gov">https://phytozome.jgi.doe.gov</a> )                                                                                                                                    |                    |                   |
|                                  | MpRVE <sup>1</sup>                                                                                                                                                                                                                         | RVE/CCA1-LHY-clade | Mapoly0042s0058.1 |
|                                  | MpTOC1 <sup>2</sup>                                                                                                                                                                                                                        | PRR/TOC1 clade     | Mapoly0085s0081.1 |

|                                   |                                                                                                         |                    |                           |
|-----------------------------------|---------------------------------------------------------------------------------------------------------|--------------------|---------------------------|
|                                   | MpPRR <sup>2</sup>                                                                                      | PRR/PRR clade      | Mapoly0122s0007.1         |
|                                   | MpELF3                                                                                                  | ELF3               | Mapoly0014s0139.1         |
|                                   | MpEFL                                                                                                   | ELF4               | Mapoly0033s0009.1         |
|                                   | MpLUX <sup>3</sup>                                                                                      | LUX                | Mapoly0101s0068.1         |
|                                   | MpGI                                                                                                    | GI                 | Mapoly0019s0145.1         |
|                                   | MpFKF                                                                                                   | ZTL                | Mapoly0004s0235.1         |
|                                   |                                                                                                         |                    |                           |
| <i>Physcomitrella patens</i>      | Data from Phytozome v11.0 ( <a href="https://phytozome.jgi.doe.gov">https://phytozome.jgi.doe.gov</a> ) |                    |                           |
|                                   | PpCCA1a                                                                                                 | RVE/CCA1-LHY-clade | BAI39991.1                |
|                                   | PpCCA1b                                                                                                 | RVE/CCA1-LHY-clade | BAI39992.1                |
|                                   | PpRVE1                                                                                                  | RVE/LCL clade      | Pp1s198_135               |
|                                   | PpRVE2                                                                                                  | RVE/LCL clade      | Pp1s160_6                 |
|                                   | PpRVE3                                                                                                  | RVE/LCL clade      | Pp1s46_272                |
|                                   | PpPRR1                                                                                                  | PRR/PRR clade      | XP_001784613              |
|                                   | PpPRR2                                                                                                  | PRR/PRR clade      | XP_001766102              |
|                                   | PpPRR3                                                                                                  | PRR/PRR clade      | XP_001784616              |
|                                   | PpPRR4                                                                                                  | PRR/PRR clade      | XP_001766105              |
|                                   | PpELF3                                                                                                  | ELF3               | Pp3c1_12790               |
|                                   | PpELF3-3                                                                                                | ELF3               | Pp3c11_14750              |
|                                   | PpELF3-2                                                                                                | ELF3               | Pp3c7_10610               |
|                                   | PpEFL                                                                                                   | ELF4               | Pp1s180_31                |
|                                   | PpLUX1                                                                                                  | LUX                | Pp3c9_14170               |
|                                   | PpLUX2                                                                                                  | LUX                | Pp3c21_6770               |
|                                   | PpLUX3                                                                                                  | LUX                | Pp3c15_13960              |
|                                   |                                                                                                         |                    |                           |
| <i>Selaginella moellendorffii</i> | Data from Phytozome v11.0 ( <a href="https://phytozome.jgi.doe.gov">https://phytozome.jgi.doe.gov</a> ) |                    |                           |
|                                   | SmRVE                                                                                                   | RVE/LCL clade      | 78045                     |
|                                   | SmTOC1                                                                                                  | PRR/TOC1 clade     | 438647                    |
|                                   | SmPRR7a                                                                                                 | PRR/PRR clade      | XP_002972852 <sup>†</sup> |
|                                   | SmPRR7b                                                                                                 | PRR/PRR clade      | XP_002979868 <sup>†</sup> |
|                                   | SmELF3                                                                                                  | ELF3               | 415241                    |
|                                   | SmEFL-1                                                                                                 | ELF4               | 118674                    |
|                                   | SmEFL-2                                                                                                 | ELF4               | 91083                     |
|                                   | SmZTL                                                                                                   | ZTL                | 174189                    |
|                                   | SmLUX                                                                                                   | LUX                | 36646                     |
|                                   | SmGI                                                                                                    | GI                 | 140066                    |
|                                   |                                                                                                         |                    |                           |
| <i>Picea abies</i>                | Data from congenie.org                                                                                  |                    |                           |
|                                   | PaCCA1                                                                                                  | RVE/CCA1-LHY-clade | MA_115536g0010            |
|                                   | PaCCA1-2                                                                                                | RVE/CCA1-LHY-clade | MA_11267g0020             |
|                                   | PaCCA1-3                                                                                                | RVE/CCA1-LHY-clade | MA_102199g0010            |
|                                   | PaPRR1                                                                                                  | PRR/TOC1 clade     |                           |

|                             |                                                                                                 |                    |                     |
|-----------------------------|-------------------------------------------------------------------------------------------------|--------------------|---------------------|
|                             | PaPRR3                                                                                          | PRR/PRR clade      |                     |
|                             | PaPRR7                                                                                          | PRR/PRR clade      |                     |
|                             | PaLUX                                                                                           | LUX                | MA_3352g0010        |
|                             | PaLUX2                                                                                          | LUX                | MA_303578g0010      |
|                             | PaZTL                                                                                           | ZTL                | MA_70291g0010       |
|                             | PaGI                                                                                            | GI                 |                     |
|                             | PaEFL-1                                                                                         | ELF4               | MA_57007g0010       |
|                             | PaEFL-2                                                                                         | ELF4               | MA_99665g0010       |
|                             | PaEFL-3                                                                                         | ELF4               | MA_866497g0010      |
|                             | PaEFL-4                                                                                         | ELF4               | MA_4172g0010        |
|                             | PaEFL-5                                                                                         | ELF4               | MA_8565294g0010     |
|                             |                                                                                                 |                    |                     |
| <i>Oryza sativa</i>         | Data from IRGSP-1.0 ( <a href="http://rapdb.dna.affrc.go.jp">http://rapdb.dna.affrc.go.jp</a> ) |                    |                     |
|                             | OsCCA1                                                                                          | RVE/CCA1-LHY-clade | Os08t0157600        |
|                             | OsRVE1                                                                                          | RVE/CCA1-LHY-clade | Os02t0685200        |
|                             | OsRVE2                                                                                          | RVE/CCA1-LHY-clade | Os04g0583900        |
|                             | OsRVE3                                                                                          | RVE/CCA1-LHY-clade | Os06t0728700        |
|                             | OsRVE4                                                                                          | RVE/LCL clade      | Os02t0680700        |
|                             | OsRVE5                                                                                          | RVE/LCL clade      | Os06t0105800        |
|                             | OsRVE6                                                                                          | RVE/LCL clade      | Os01t0156000        |
|                             | OsPRR1                                                                                          | PRR/TOC1 clade     | Os02g0618200        |
|                             | OsPRR37                                                                                         | PRR/PRR clade      | Os07g0695100        |
|                             | OsPRR73                                                                                         | PRR/PRR clade      | Os03g0284100        |
|                             | OsPRR95                                                                                         | PRR/PRR clade      | Os09g0532400        |
|                             | OsPRR59                                                                                         | PRR/PRR clade      | Os11g0157600        |
|                             | OsZTL1                                                                                          | ZTL                | <u>Os11t0547000</u> |
|                             | OsZTL2                                                                                          | ZTL                | <u>Os06t0694000</u> |
|                             | OsFKF1                                                                                          | ZTL                | <u>Os11t0547000</u> |
|                             | OsPCL1                                                                                          | LUX                | Os01g0971800        |
|                             | OsELF3-1                                                                                        | ELF3               | Os06t0142600        |
|                             | OsELF3-2                                                                                        | ELF3               | Os01t0566100        |
|                             | OsEFL-1                                                                                         | ELF4               | OS11G0621500        |
|                             | OsEFL-2                                                                                         | ELF4               | OS03G0410300        |
|                             | OsEFL-3                                                                                         | ELF4               | OS08G0366200        |
|                             | OsGI                                                                                            | GI                 | Os01g0182600        |
|                             |                                                                                                 |                    |                     |
| <i>Arabidopsis thaliana</i> | Data from TAIR 10 ( <a href="http://www.arabidopsis.org">www.arabidopsis.org</a> )              |                    |                     |
|                             | AtCCA1                                                                                          | RVE/CCA1-LHY-clade | At2g46830           |
|                             | AtLHY                                                                                           | RVE/CCA1-LHY-clade | At1g01060           |
|                             | AtRVE1                                                                                          | RVE/CCA1-LHY-clade | At5g17300           |
|                             | AtRVE2                                                                                          | RVE/CCA1-LHY-clade | At5g37260           |

|             |                    |           |
|-------------|--------------------|-----------|
| AtRVE3      | RVE/LCL clade      | At1g01520 |
| AtRVE4      | RVE/LCL clade      | At5g02840 |
| AtRVE5      | RVE/LCL clade      | At4g01280 |
| AtRVE6      | RVE/LCL clade      | At5g52660 |
| AtRVE7      | RVE/CCA1-LHY-clade | At1g18330 |
| AtRVE7-like | RVE/CCA1-LHY-clade | At3g10113 |
| AtRVE8      | RVE/LCL clade      | At3g09600 |
| AtTOC1      | PRR/TOC1 clade     | At5g61380 |
| AtPRR3      | PRR/PRR clade      | Ag5g60100 |
| AtPRR5      | PRR/PRR clade      | Ag5g24470 |
| AtPRR7      | PRR/PRR clade      | Ag5g02810 |
| AtPRR9      | PRR/PRR clade      | Ag2g46790 |
| AtZTL       | ZTL                | At5g57360 |
| AtFKF1      | ZTL                | At1g68050 |
| AtLKP2      | ZTL                | At2g18915 |
| AtLUX       | LUX                | At3g46640 |
| AtBOA       | LUX                | At5g59570 |
| AtELF3      | ELF3               | At2g25930 |
| AtEEC       | ELF3               | At3g21320 |
| AtELF4      | ELF4               | At2g40080 |
| AtEFL-1     | ELF4               | At2g29950 |
| AtEFL-2     | ELF4               | At1g72630 |
| AtEFL-3     | ELF4               | At2g06255 |
| AtEFL-4     | ELF4               | At1g17455 |
| AtGI        | GI                 | At1g22770 |

<sup>?</sup> Uncertain homology.

<sup>1</sup>The second most similar *M. polymorpha* gene from the BLAST searches, Mapoly0026s0070, was excluded from further analyses as it resembled At5g08520 and related genes with high similarity to *DIVARICATA* in reciprocal BLAST searches (Galego & Almeida, 2002).

<sup>2</sup>The third best *M. polymorpha* BLAST hit was Mapoly0101s0006. This protein contains a MYB domain not present in PRR family members and it also lack the C-terminal CCT domain. Reciprocal BLAST searches against the Arabidopsis genome gave RESPONSE REGULATOR1 (RR1) as the best hit, indicating Mapoly0101s0006 belongs to the RR family.

<sup>3</sup>As with MpTOC1/PRR the most similar protein to MpLUX in the *M. polymorpha* genome is the RR-family member Mapoly0101s0006.1.

**Table S2** Oligonucleotides used in this study.

| <b>Primer name</b> | <b>Sequence - 5' to 3'</b>                 | <b>Comments</b>                 |
|--------------------|--------------------------------------------|---------------------------------|
| AaCCA1 F           | CGAAGCCATGCCAGAAATT                        | qRT-PCR                         |
| AaCCA1 R           | CGGTGGTGGGATGTCTATGT                       | qRT-PCR                         |
| AaELF3 F           | AGGACGGCATTACTGACACA                       | qRT-PCR                         |
| AaELF3 R           | GTGGATGACGGTGCTTTTCA                       | qRT-PCR                         |
| AaELF4_2011664 F   | CCCAGTACCGGTGATGATGA                       | qRT-PCR                         |
| AaELF4_2011664 R   | TCTGTTGCAGCGGTCAATAC                       | qRT-PCR                         |
| AaELF4_2045507 F   | TCACTGATCACGGAGCTGAA                       | qRT-PCR                         |
| AaELF4_2045507 R   | CCACACTCTGAAACGTGCTT                       | qRT-PCR                         |
| AaELF4_2048939 F   | TGTCCGCTGTTTTTCGAGAAG                      | qRT-PCR                         |
| AaELF4_2048939 R   | GCCACACATCCAGTCTCCTT                       | qRT-PCR                         |
| AaGI F             | GGGAGACGCTTCGGTTATTG                       | qRT-PCR                         |
| AaGI R             | TCATCGTTCCCTCTGCTTGT                       | qRT-PCR                         |
| AaLUX F            | ATGCCTGCTCACATGGGATT                       | qRT-PCR                         |
| AaLUX R            | CCATAGGGTCCCATGCTCAA                       | qRT-PCR                         |
| AaPRR F            | CTAACGTGGGAGGTTGAGGT                       | qRT-PCR                         |
| AaPRR R            | ACCGATATCCACAGCACCAT                       | qRT-PCR                         |
| AaRVE F            | CCGGCAAAGAACATGGAGT                        | qRT-PCR                         |
| AaRVE R            | CGGCCACAGGTGAAAGTAAC                       | qRT-PCR                         |
| AaTUB F            | ACGCCTGAACATCTCCTGAA                       | qRT-PCR                         |
| AaTUB R            | CGTGCAGAACAAGAACTCGT                       | qRT-PCR                         |
| AaZTL F            | GGGTGGAGGTGGAGTATCTG                       | qRT-PCR                         |
| AaZTL R            | GAGTGAAGAGGAGCCCAAGT                       | qRT-PCR                         |
| CPEP23_2           | AGTACCTGACGACCACTAGCGAACC                  | Rev MpRVE <sub>pro</sub> 1.9kb  |
| CPEP24             | caccAGGTACCCGGGAGTTCAGTA <sup>2</sup>      | Fwd MpRVE <sub>pro</sub> 1.9kb  |
| CPEP29             | caccTTGATGCTTCTCGCCTT <sup>2</sup>         | Fwd MpGI <sub>pro</sub> 5.4kb   |
| CPEP30             | AGGGCCAATCTCCAAAGG                         | Rev MpGI <sub>pro</sub> 5.4kb   |
| CPEP32             | caccATGGTATGGGCAGTGGAGGC <sup>2</sup>      | Fwd MpLUX <sub>pro</sub> 5.5kb  |
| CPEP33             | CGCTGCCATTCACTTCGAAGTGTG                   | Rev MpLUX <sub>pro</sub> 5.5kb  |
| CPEP49             | caccGGCTTGTTTCTTGCTTG <sup>2</sup>         | Fwd MpELF4 <sub>pro</sub> 5.8kb |
| CPEP50             | CGCTTCCAGACTCGAAATCTCTACT                  | Rev MpELF4 <sub>pro</sub> 5.8kb |
| <b>EFpro_R</b>     | <b>CAACCTTTCTGCAGGCACATC</b>               | <b>Genotyping<sup>19</sup></b>  |
| <b>gMpPRR_F</b>    | <b>CACCAGCCTGCACATTCTTGGTCT</b>            | <b>Fwd Compl. test</b>          |
| <b>gMpPRR_R</b>    | <b>TGAAGGGTAACAAGTGCAAACA</b>              | <b>Rev Compl. test</b>          |
| <b>gMpRVE_F</b>    | <b>CACCATTGTTTGCAGCCCTTCTTT</b>            | <b>Fwd Compl. test</b>          |
| <b>gMpRVE_R</b>    | <b>CGTGATTGGACGAGGAGATT</b>                | <b>Rev Compl. Test</b>          |
| <b>HPT_F</b>       | <b>GTATAATGTATGCTATACGAAGTTATGTTT</b>      | <b>Genotyping<sup>20</sup></b>  |
| ME292              | caccTGTTTGATGCTGACAGTTTGGGAAA <sup>2</sup> | Fwd MpPRR <sub>pro</sub> 4.0kb  |
| ME303              | TAACGCACTAATCTGGCAAGCAACA                  | Rev MpPRR <sub>pro</sub> 4.0kb  |
| ME367              | CGAAAGCCCAAGAAGCTACC                       | Fwd MpAPT qRT-PCR <sup>1</sup>  |
| ME368              | GTACCCCGGTTGCAATAAG                        | Rev MpAPT qRT-PCR <sup>1</sup>  |
| ME369              | AGGCATCTGGTATCCACGAG                       | Fwd MpACT qRT-PCR <sup>1</sup>  |
| ME370              | ACATGGTCGTTCCCTCCAGAC                      | Rev MpACT qRT-PCR <sup>1</sup>  |
| ME428              | caccGGAAAACCATGGACTGACT <sup>2</sup>       | Fwd MpELF3 <sub>pro</sub> 2.1kb |
| ME429              | GCCTCACTCTCACGACAACA                       | Rev MpELF3 <sub>pro</sub> 2.1kb |
| MpELF3 F           | ATCTTCCTCCCAGTCTTCTTCG                     | qRT-PCR                         |
| MpELF3 R           | ACAGCAGATGATATTCGCAT                       | qRT-PCR                         |
| MpELF4 F           | GGCAGCGCAATCTCAAGAAAA                      | qRT-PCR                         |
| MpELF4 R           | AGGCTCATAATTCCCGCAGATT                     | qRT-PCR                         |
| MpGI F             | TTGATCTGCGACCTCCTCATTT                     | qRT-PCR                         |
| MpGI R             | CATGACCTTGGATGGAGAAGCT                     | qRT-PCR                         |
| MpLUX F            | TGGGAGAGCATAGAGAATTCATG                    | qRT-PCR                         |
| MpLUX R            | ATTTCTCATGACTCTCGCTCT                      | qRT-PCR                         |
| MpPRR F            | CAGCAGCTCCTTTGAACAAACA                     | qRT-PCR                         |
| MpPRR R            | GCCGTGAAGCAGGAAAGAGAAT                     | qRT-PCR                         |

|                       |                                                            |                          |
|-----------------------|------------------------------------------------------------|--------------------------|
| <b>MpPRR_GT3_F</b>    | <b>AACACTAGTGGCGGGCTGGGAAAGCTTCCTACCT<sup>4</sup></b>      | Ko-plasm.                |
| <b>MpPRR_GT3_R</b>    | <b>TTATCCCTAGGCGGGCTGGAGAAGGCAAAGTAC<sup>4</sup></b>       | Ko-plasm.                |
| <b>MpPRR_GT5_F</b>    | <b>CTAAGGTAGCGATTAATCAACAATGAGCCATTCTATCTG<sup>5</sup></b> | Ko-plasm.                |
| <b>MpPRR_GT5_R</b>    | <b>CCGGGCAAGCTTTTTAATAAGGCGTGAACCTGTATCGT<sup>5</sup></b>  | Ko-plasm.                |
| MpRVE_F               | AAACCTCGGCAAAATCAGGAGT qRT-PCR                             |                          |
| MpRVE_R               | GGCGAGGCAATTTTCAAGCTG qRT-PCR                              |                          |
| <b>MpRVE_GT3_F</b>    | <b>AACACTAGTGGCGCGCCTTAAAGTGGGGCAACTGA<sup>6</sup></b>     | Ko-plasm.                |
| <b>MpRVE_GT3_R</b>    | <b>TTATCCCTAGGCGCGGGACCCTGATAACTACGA<sup>6</sup></b>       | Ko-plasm.                |
| <b>MpRVE_GT5_F</b>    | <b>CTAAGGTAGCGATTAATCGTACGCCACCAAAGAATTT<sup>7</sup></b>   | Ko-plasm.                |
| <b>MpRVE_GT5_R</b>    | <b>CCGGGCAAGCTTTTTAATTAAGCAGTCCGAGACCGAAT<sup>7</sup></b>  | Ko-plasm.                |
| MpTOC1_F              | CGAAGGAAGAACGACTGAAGCA qRT-PCR                             |                          |
| MpTOC1_R              | TCTGAGACATTTGACGACGACA qRT-PCR                             |                          |
| <b>MpTOC1_GT3_F</b>   | <b>AACACTAGTGGCGCGTCTTTTGCATTGTGATTTTCG<sup>8</sup></b>    | Ko-plasm.                |
| <b>MpTOC1_GT3_R</b>   | <b>TTATCCCTAGGCGCGCTATGGACAGGTGGGTGCTT<sup>8</sup></b>     | Ko-plasm.                |
| <b>MpTOC1_GT5_F</b>   | <b>CAAAGGTAGCGATTAATCGTCAATGAAAGATGCGATG<sup>9</sup></b>   | Ko-plasm.                |
| <b>MpTOC1_GT5_R</b>   | <b>CCGGGCAAGCTTTTTAATATGGAAATCTCCCTCGGAGT<sup>9</sup></b>  | Ko-plasm.                |
| MpTUB <sup>3</sup> _F | AGGGGCTGAACTCATAGACTCT qRT-PCR                             |                          |
| MpTUB <sup>3</sup> _R | TATGAGGAGAGTACCCATGCCA qRT-PCR                             |                          |
| MpZTL_F               | TGTTTCGAGTTCATAACAGGCTACA qRT-PCR                          |                          |
| MpZTL_R               | CATCGTTTTAATCGTTGCAACAT qRT-PCR                            |                          |
| <b>prrho_F1</b>       | <b>GTTTTGAAGAAGAGCTCCCA</b>                                | Genotyping <sup>13</sup> |
| <b>prrho_R1</b>       | <b>GGATTTCGGAAACCGATTTTTT</b>                              | Genotyping <sup>13</sup> |
| <b>prrho_F2</b>       | <b>AAAATGAAACGTGCTAATTTTGG</b>                             | Genotyping <sup>14</sup> |
| <b>prrho_R3</b>       | <b>CGCAGACATCGAACACTGAT</b>                                | Genotyping <sup>15</sup> |
| <b>RP_LUC_F1</b>      | <b>AATCCATCTTGCTCCAACACC</b>                               | qRT-PCR                  |
| <b>RP_LUC_R1</b>      | <b>CCGTGCTCCAAAACAACAAC</b>                                | qRT-PCR                  |
| <b>RP_PRR_F1</b>      | <b>CAGAAGACGATGATTCCACCAG</b>                              | qRT-PCR                  |
| <b>RP_PRR_R1</b>      | <b>CATCTCCCAGGCTTGCAATTC</b>                               | qRT-PCR                  |
| <b>rveko_F1</b>       | <b>TGAGAATCCCTTATGCCCTG</b>                                | Genotyping <sup>10</sup> |
| <b>rveko_R1</b>       | <b>TAGCATTCTTCAGGGGTTTCG</b>                               | Genotyping <sup>10</sup> |
| <b>rveko_F2</b>       | <b>TGATCAAATGCGACCAAATG</b>                                | Genotyping <sup>11</sup> |
| <b>rveko_R3</b>       | <b>AAGGATTGCGCTCATGTTTT</b>                                | Genotyping <sup>12</sup> |
| <b>tocko_F1</b>       | <b>GCTAGACACAGCCAACAACG</b>                                | Genotyping <sup>16</sup> |
| <b>tocko_R1</b>       | <b>TTGCTAAGCCAAGTGGAGGT</b>                                | Genotyping <sup>16</sup> |
| <b>tocko_F2</b>       | <b>TTTACCGGATTGATTCCATGA</b>                               | Genotyping <sup>17</sup> |
| <b>tocko_R3</b>       | <b>CCAGTGAGAAGCTGGAGGAC</b>                                | Genotyping <sup>18</sup> |

## Notes

Primers in **bold** were used in the Kyoto lab. All other primers were used in the Uppsala lab.

- 1) Saint-Marcoux *et al.*, 2015
- 2) “cacc” is added to the 5’ end of the F primer for directional TOPO cloning in pENTR/D-TOPO (Thermofisher)
- 3) The gene ID for MpTUBβ2 is Mapoly0158s0010.1
- 4) MpPRR 3’ homologous arm
- 5) MpPRR 5’ homologous arm
- 6) MpRVE 3’ homologous arm
- 7) MpRVE 5’ homologous arm
- 8) MpTOC1 3’ homologous arm
- 9) MpTOC1 5’ homologous arm
- 10) Illustrated as primer set 1 in S8
- 11) Illustrated as primer set 2 in S8
- 12) Illustrated as primer set 3 in S8



- 13) Illustrated as primer set 1 in S9
- 14) Illustrated as primer set 2 in S9
- 15) Illustrated as primer set 3 in S9
- 16) Illustrated as primer set 1 in S10
- 17) Illustrated as primer set 2 in S10
- 18) Illustrated as primer set 3 in S10
- 19) Illustrated as primer set 2 in S8-10
- 20) Illustrated as primer set 3 in S8-10

**Methods S1** Supplemental materials and methods describing sequence retrieval, sequence analysis and phylogenetic reconstruction.

### **Inventory of putative bryophyte and charophyte circadian clock genes**

Homologs to *Arabidopsis thaliana* circadian clock genes were first identified in the liverwort *Marchantia polymorpha*, in the hornwort *Anthoceros agrestis* and in the charophyte *Klebsormidium flaccidum*. Initial gene family classification was supported by BLAST e-values, reciprocal BLAST searches to the Arabidopsis genome, characterization of conserved protein domains and by BLAST searches against the oneKP database ([www.onekp.com](http://www.onekp.com)).

### **Sequence retrieval**

*M. polymorpha* genes were identified using Arabidopsis amino acid sequences as queries in tBLASTn searches in the publically available *M. polymorpha* genome v. 3.1 (Phytozome 11; <https://phytozome.jgi.doe.gov>). *A. agrestis* genes were likewise obtained searching the oneKP database ([www.onekp.com](http://www.onekp.com)). Algal gene sequences were retrieved from the publically available *K. flaccidum* genome V1.0 database (<http://www.plantmorphogenesis.bio.titech.ac.jp/>) and from transcriptome NGS data for the streptophyte algae *Cylindrocystis cushleackae* (Cc; Acc. No. ERR364373) and *Coleochaete irregularis*. (Ci; Acc. No. ERR364367), which were obtained from the NCBI short read archive (SRA). Sequences were assembled using Trinity r20131110 (Haas *et al.*, 2013), tBLASTn searches were performed and gene prediction was done using the web-based FGENESH+ program. Homologs were also retrieved from the following species: *A. thaliana*, *Oryza sativa*, *Selaginella moellendorffii*, *Picea abies* and *P. patens*. Arabidopsis sequences were downloaded from TAIR ([www.arabidopsis.org](http://www.arabidopsis.org)). Genes of other species were identified by BLASTp searches with Arabidopsis queries against databases at JGI (<http://www.jgi.doe.gov/>), NCBI (<http://ncbi.nlm.nih.gov>) and plantGDB (<http://www.plantgdb.org>). To investigate the distribution of identified clock homologs among charophyte algae, hornworts, liverworts and mosses, BLAST searches were performed against the oneKP database ([www.onekp.com](http://www.onekp.com)). All previously identified clock genes as well as genes

identified in this study are listed with accession numbers in Supporting Information Table S1.

### **Sequence analysis and phylogenetic reconstruction**

Conserved protein motifs and domains were identified using MEME Suite MAST (<http://meme-suite.org>; Bailey & Gribskov, 1998; Bailey *et al.*, 2009), SMART (Schultz *et al.*, 1998; Letunic *et al.*, 2015), and NCBI CD-search (CDD v.3.14; Marchler-Bauer & Bryant, 2004; Marchler-Bauer *et al.*, 2015). Amino acid sequences were aligned using the M-Coffee algorithm in T-Coffee (Notredame *et al.*, 2000; Wallace *et al.*, 2006). Alignments were filtered using Transitive Consistency Score (TCS) in the T-Coffee distribution (Chang *et al.*, 2014) and are available in Supporting Information Fig. S1. Phylogenetic reconstructions were done using PhyML 3.0 (Guindon *et al.*, 2010) and MrBayes 3.2.6 (Huelsenbeck & Ronquist, 2001; Ronquist *et al.*, 2012). For MrBayes the substitution model used was decided individually for each alignment using Modelgenerator v.85 (Keane *et al.*, 2006). The final phylograms were visualized and edited in TreeGraph2 (Stöver & Müller, 2010), where the Bayesian tree was used as reference tree on which both posterior probabilities and bootstrap proportion from PhyML were mapped. Branches resulting in conflicting topologies from the two methods were collapsed. Trees were rooted with charophyte sequences, except for the CCA1/LHY/RVE and PRR families that were midpoint rooted.

## References for Supporting information

**Bailey TL, Boden M, Buske FA, Frith M, Grant CE, Clementi L, Ren J, Li WW, Noble WS. 2009.** MEME SUITE: tools for motif discovery and searching. *Nucleic Acids Research* **37**: W202–W208.

**Bailey TL, Gribskov M. 1998.** Methods and statistics for combining motif match scores. *Journal of Computational Biology* **5**: 211–221

**Chang J-M, Di Tommaso P, Notredame C. 2014.** TCS: a new multiple sequence alignment reliability measure to estimate alignment accuracy and improve phylogenetic tree reconstruction. *Molecular Biology and Evolution* **31**: 1625–1637.

**Galego L, Almeida J. 2002.** Role of *DIVARICATA* in the control of dorsoventral asymmetry in *Antirrhinum* flowers. *Genes & Development* **16**: 880–891.

**Guindon S, Dufayard J-F, Lefort V, Anisimova M, Hordijk W, Gascuel O. 2010.** New algorithms and methods to estimate maximum-likelihood phylogenies: assessing the performance of PhyML 3.0. *Systematic Biology* **59**: 307–321.

**Haas BJ, Papanicolaou A, Yassour M, Grabherr M, Blood PD, Bowden J, Couger MB, Eccles D, Li B, Lieber M *et al.* 2013.** De novo transcript sequence reconstruction from RNA-seq using the Trinity platform for reference generation and analysis. *Nature Protocols* **8**: 1494–1512.

**Huelsenbeck JP, Ronquist F. 2001.** MRBAYES: Bayesian inference of phylogenetic trees. *Bioinformatics (Oxford, England)* **17**: 754–755.

**Keane TM, Creevey CJ, Pentony MM, Naughton TJ, McInerney JO. 2006.** Assessment of methods for amino acid matrix selection and their use on empirical data shows that ad hoc assumptions for choice of matrix are not justified. *BMC Evolutionary Biology* **6**: 29.

**Letunic I, Doerks T, Bork P. 2015.** SMART: recent updates, new developments and status in 2015. *Nucleic Acids Research* **43**: D257–D260.

**Marchler-Bauer A, Bryant SH. 2004.** CD-Search: protein domain annotations on the fly. *Nucleic Acids Research* **32**: W327–W331.

**Marchler-Bauer A, Derbyshire MK, Gonzales NR, Lu S, Chitsaz F, Geer LY, Geer RC, He J, Gwadz M, Hurwitz DI *et al.* 2015.** CDD: NCBI's conserved domain database. *Nucleic Acids Research* **43**: D222–D226.

**Notredame C, Higgins DG, Heringa J. 2000.** T-Coffee: a novel method for fast and accurate multiple sequence alignment. *Journal of Molecular Biology* **302**: 205–217.

**Ronquist F, Teslenko M, van der Mark P, Ayres DL, Darling A, Höhna S, Larget B, Liu L, Suchard MA, Huelsenbeck JP. 2012.** MrBayes 3.2: efficient Bayesian phylogenetic inference and model choice across a large model space. *Systematic Biology* **61**: 539–542.

**Saint-Marcoux D, Proust H, Dolan L, Langdale JA. 2015.** Identification of reference genes for real-time quantitative PCR experiments in the liverwort *Marchantia polymorpha*. *PLoS ONE* **10**: e0118678.

**Schultz J, Milpetz F, Bork P, Ponting CP. 1998.** SMART, a simple modular architecture research tool: identification of signaling domains. *Proceedings of the National Academy of Sciences, USA* **95**: 5857–5864.

**Stöver BC, Müller KF. 2010.** TreeGraph 2: Combining and visualizing evidence from different phylogenetic analyses. *BMC Bioinformatics* **11**: 7.

**Wallace IM, O'Sullivan O, Higgins DG, Notredame C. 2006.** M-Coffee: combining multiple sequence alignment methods with T-Coffee. *Nucleic Acids Research* **34**: 1692–1699.
